# Supplementary material for: Synthesis of a non-natural glucose-2-phosphate ester able to dupe the acc system of Agrobacterium fabrum
Source: Royal Society of Chemistry journal article supplement (doi:10.1039/c8ob03086c), 2019-01-01
Supplement: c8ob03086c1.pdf [file c8ob03086c1.pdf]

## ELECTRONIC SUPPLEMENTARY INFORMATION

### Synthesis of a non-natural glucose-2-phosphate ester able to dupe the *acc* system of *Agrobacterium fabrum*

Si-Zhe Li,<sup>a,#</sup> Armelle Vigouroux,<sup>b,#</sup> Mohammed Ahmar,<sup>a</sup> Abbas El Sahili,<sup>b</sup> Laurent Soulère,<sup>a</sup>  
Laïla Sago,<sup>b</sup> David Cornu,<sup>b</sup> Solange Moréra,<sup>b</sup> \* Yves Queneau<sup>a\*</sup>

# *Equal contribution*

<sup>a</sup> Univ Lyon, Institut de Chimie et Biochimie Moléculaires et Supramoléculaires, CNRS, Université Lyon 1, INSA Lyon, CPE Lyon, ICBMS, UMR 5246 ; Université Claude Bernard, Bâtiment Lederer, 1 Rue Victor Grignard, 69622 Villeurbanne Cedex, France, Yves.queneau@insa-lyon.fr

<sup>b</sup> Institute for Integrative Biology of the Cell (I2BC), CNRS CEA Université Paris-Sud, Université Paris-Saclay. Avenue de la Terrasse, Gif-sur-Yvette 91198, France, Solange.morera@i2bc.paris-saclay.fr

### Data collection and processing statistics for the structure of AccA in complex with G2LP

Page 2

### 2D NMR Characterization of Glucose-2-lactate phosphate ammonium

page 3-6

### <sup>1</sup>H and <sup>13</sup>C NMR for compounds 2 to 6 and G2LP

page 7-19

**Table 1.** Crystallographic data and refinement parameters

|                             | AccA-G2LP                                                   |
|-----------------------------|-------------------------------------------------------------|
| Space group                 | I222                                                        |
| Cell parameters (Å,°)       | $a = 78.3$<br>$b = 108.3$<br>$c = 108.2$<br>$\beta = 113.6$ |
| Resolution (Å)              | 42-1.8<br>(1.91-1.8)                                        |
| No. of observed reflections | 274443<br>(42603)                                           |
| No. of unique reflections   | 45083<br>(7249)                                             |
| $R_{sym}$ (%)               | 9<br>(121.5)                                                |
| Completeness (%)            | 99.5<br>(98.2)                                              |
| $I/\sigma$                  | 12.9<br>(1.6)                                               |
| $CC_{1/2}$                  | 99.8<br>(58.6)                                              |
| $R_{cryst}$ (%)             | 17.1                                                        |
| $R_{free}$ (%)              | 19.5                                                        |
| rms bond deviation (Å)      | 0.01                                                        |
| rms angle deviation (°)     | 1.0                                                         |
| Average B (Å <sup>2</sup> ) |                                                             |
| protein                     | 38.8                                                        |
| ligand                      | 28.3                                                        |
| solvent                     | 40                                                          |

Values for the highest resolution shell are in parentheses

## 2D NMR Characterization of Glucose-2-lactate phosphate ammonium

Glucose-2-lactate phosphate ammonium salt was characterized by 2D-NMR. A mixture of  $\alpha/\beta$  with 5/3 ratio was calculated from the integration of H-1 signals. H-1 $\alpha$  at 5.36 ppm with  $J_{1,2} = 3.6$  Hz, and H-1 $\beta$  at 4.68 ppm with  $J_{1,2} = 7.9$  Hz, partially hidden by deuterium oxide. With the help of  $^1\text{H}$ - $^1\text{H}$  COSY, we found H-2 $\alpha$  as a multiplet at 3.95 ppm and H-2 $\beta$  at 3.77 ppm, impaired by H-3 $\alpha$ , H-5 $\alpha$ . In addition, the  $\alpha$  and  $\beta$  CH- group of lactic acid as multiplets were found at 4.5 ppm, and the corresponding  $\alpha$  and  $\beta$  CH<sub>3</sub>- are doublet at 1.40 ppm. Decomposition of G2P lactate can be easily traced signals at 4.5 ppm and 1.4 ppm for free lactic acid (**Fig 1**).

Like G2P (ref 12), HSQC shows coupling with phosphorus for  $^{13}\text{C}$ -NMR signals. The carbon of  $\alpha$  and  $\beta$  CH- group appears as doublet ( $\delta=73.1$  ppm,  $J_{\text{C-P}} = 5.7$  Hz), and the same splitting is also overserved for C-1, C-2 and C-3 (**Fig 2**). The differences are shown in the **Table 2**.

In comparison with glucose-2-phosphate (ref 12), the carbon shift of C-1, C-2 and C-3 of G2P lactate move to high fields slightly, and the  $\alpha$ -anomer locates in a higher field than  $\beta$ -anomer in both cases. The coupling constant is almost the same except  $J_{\text{C2-P}}$  of glucose-2-lactate phosphate which is stronger than that of glucose-2-phosphate due to the introduction of lactic acid. This could be explained by the conformation adjustment. Among those three carbons, the  $J$ -coupling of C-2 is the strongest one since the coupling of C-2 and phosphorus is the second-order coupling whereas others are third-order coupling. More interestingly, for  $\alpha$  and  $\beta$  glucose phosphate, in both case, the  $J$ -coupling of C-1 and C-3 exhibit distinct differences.

2D NMR of the  $^{31}\text{P}$ - $^1\text{H}$  correlation shows the  $^{31}\text{P}$ -NMR of H-2 $\alpha$  and CH $\alpha$  appears at -1.16 ppm, and H-2 $\beta$  and CH $\beta$  at -0.86 ppm. Theoretically, four phosphorus signals (C2 $\alpha$ , C2 $\beta$ , CH $\alpha$ , CH $\beta$ ) should be observed. The proximity of  $^{31}\text{P}$ -NMR chemical signals of CH and H-2 resulted in only two peaks, and the high resolution NMR spectroscopy could give more details (**Fig 3**).

**Table 2. Partial  $^1\text{H}$ -NMR and  $^{13}\text{C}$ -NMR of G2P lactate**

| $\alpha$ -anomer |                    |                 |                    | $\beta$ -anomer |                    |                 |                    |
|------------------|--------------------|-----------------|--------------------|-----------------|--------------------|-----------------|--------------------|
| H-1              | 5.36 ( $J=3.6$ Hz) | C-1             | 90.9 ( $J=2.0$ Hz) | H-1             | 4.68 ( $J=7.9$ Hz) | C-1             | 95.0 ( $J=5.1$ Hz) |
| H-2              | 3.95               | C-2             | 75.7 ( $J=6.8$ Hz) | H-2             | 3.79               | C-2             | 78.9 ( $J=6.6$ Hz) |
| H-3              | 3.75 - 3.81        | C-3             | 71.5 ( $J=5.6$ Hz) | H-3             | 3.63 - 3.56        | C-3             | 75.0 ( $J=2.7$ Hz) |
| H <sub>CH</sub>  | 4.56               | C <sub>CH</sub> | 73.1 ( $J=5.7$ Hz) | H <sub>CH</sub> | 4.49               | C <sub>CH</sub> | 73.1 ( $J=5.7$ Hz) |

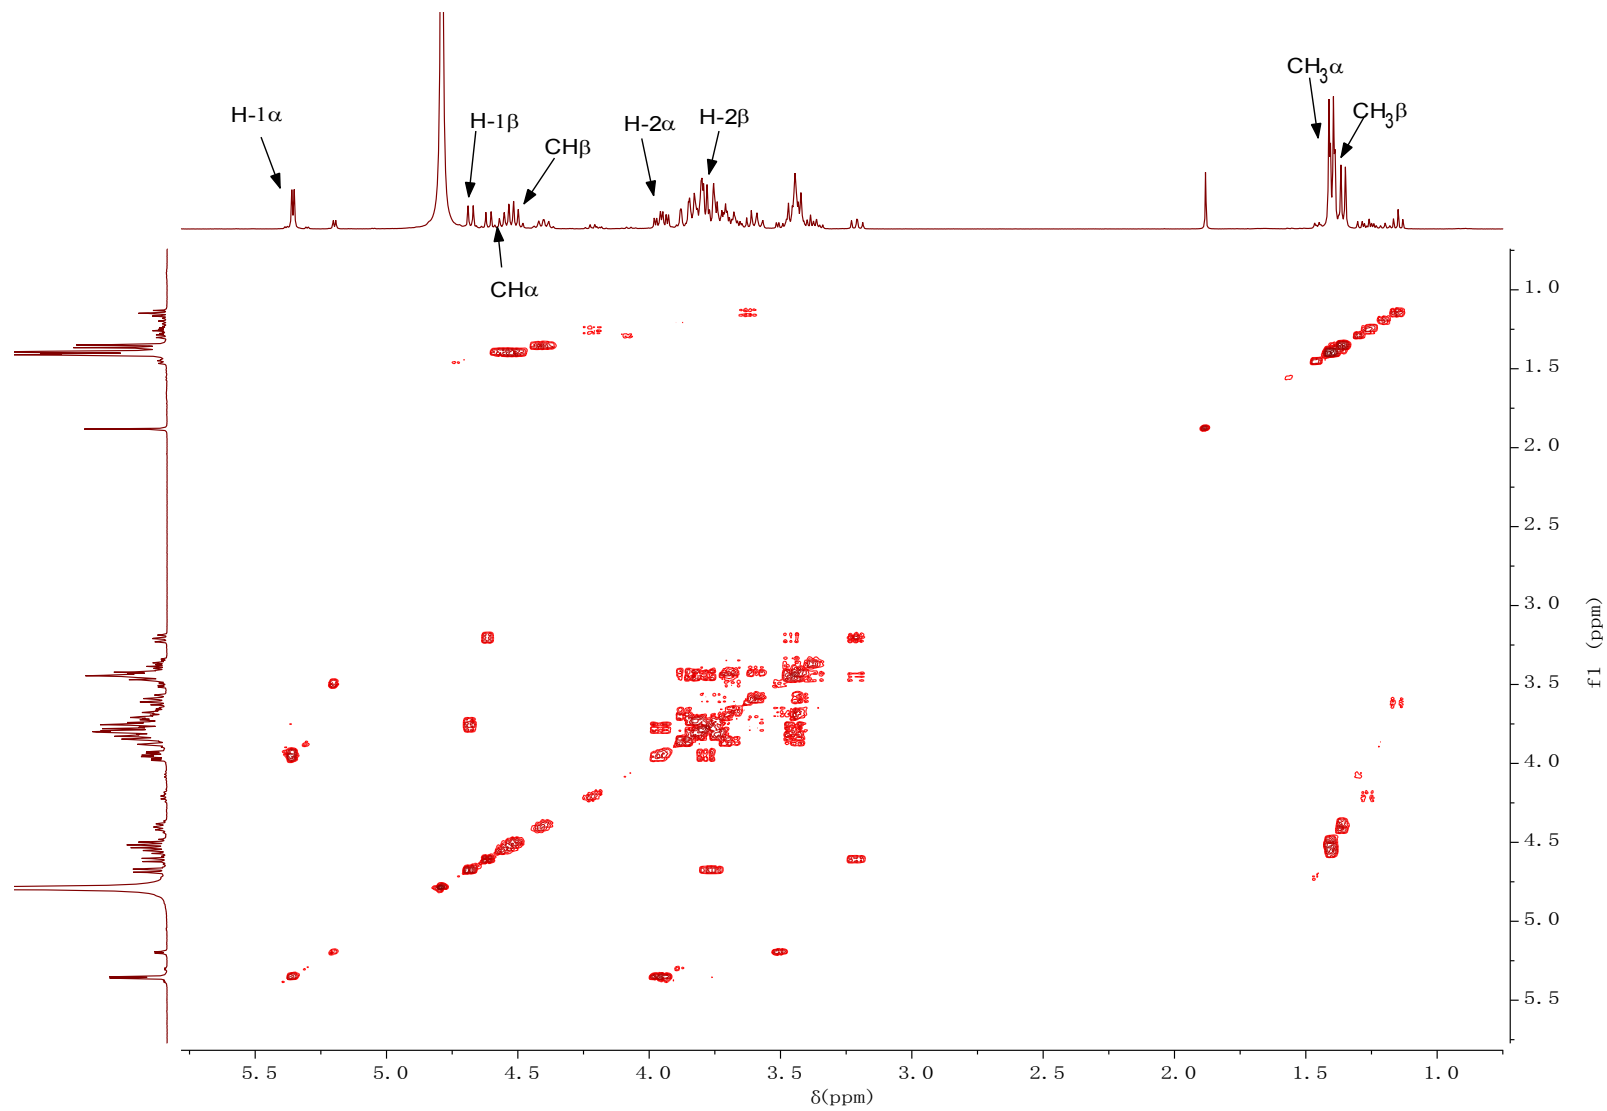

**Fig 1.  $^1\text{H}$ - $^1\text{H}$  COSY of G2P lactate (400 MHz,  $\text{D}_2\text{O}$ )**

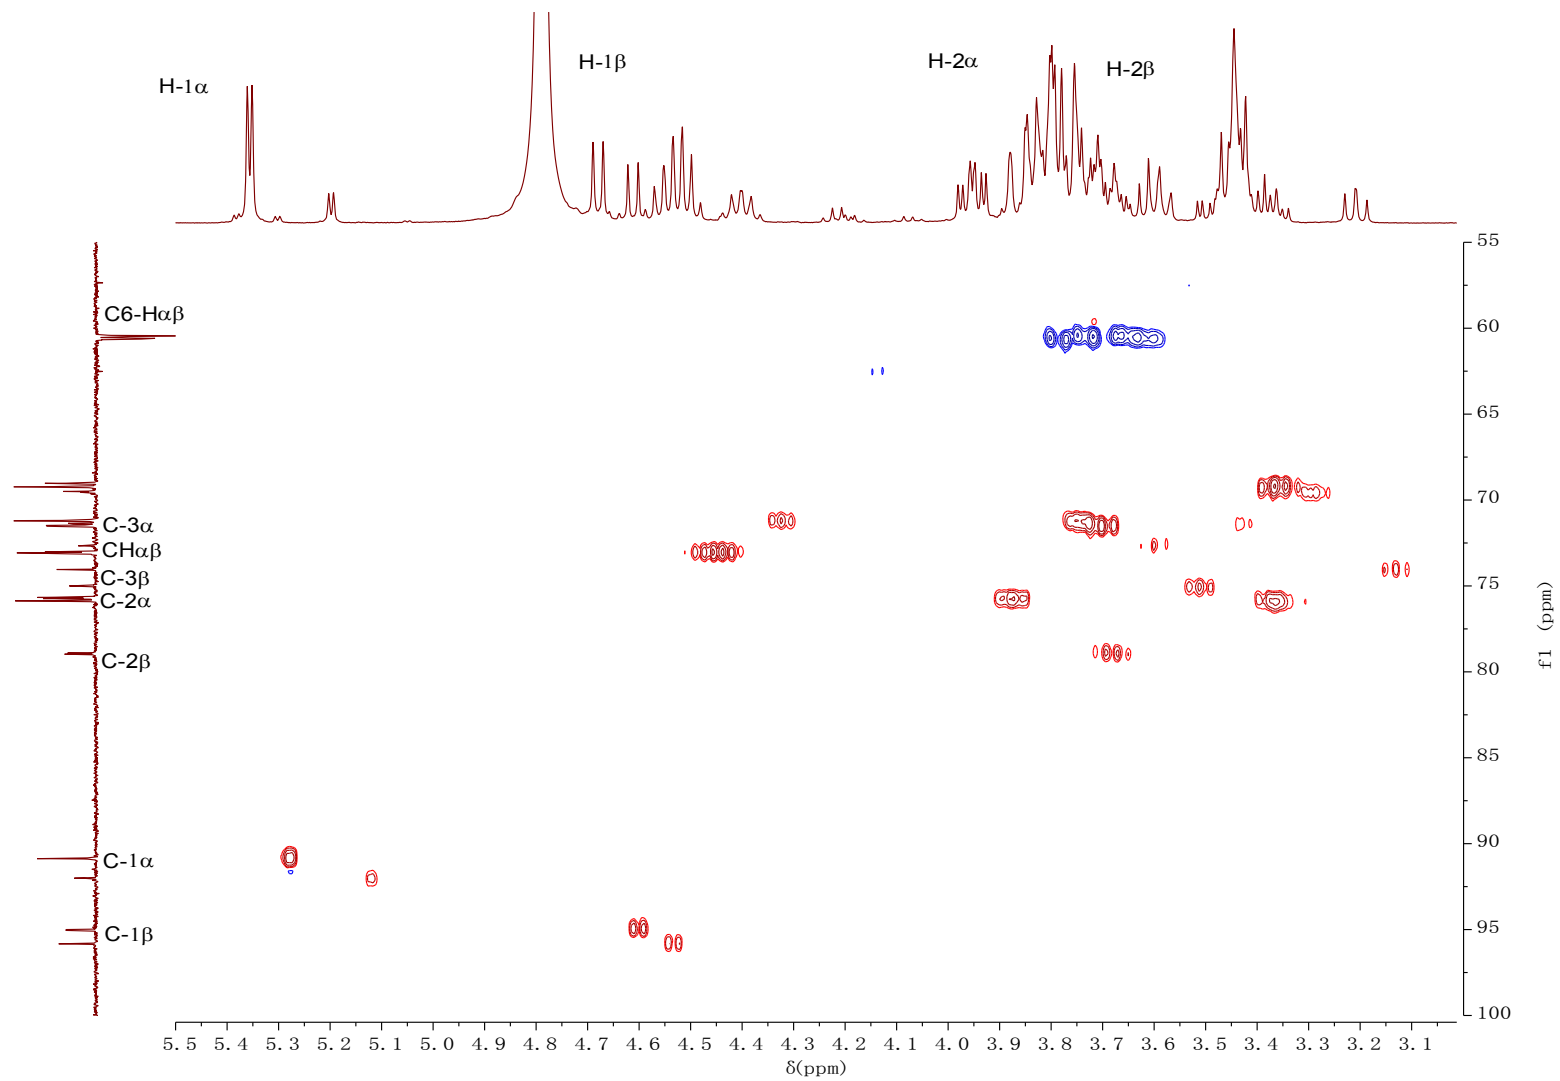

**Fig 2. HSQC of G2P lactate (400 MHz, D<sub>2</sub>O)**

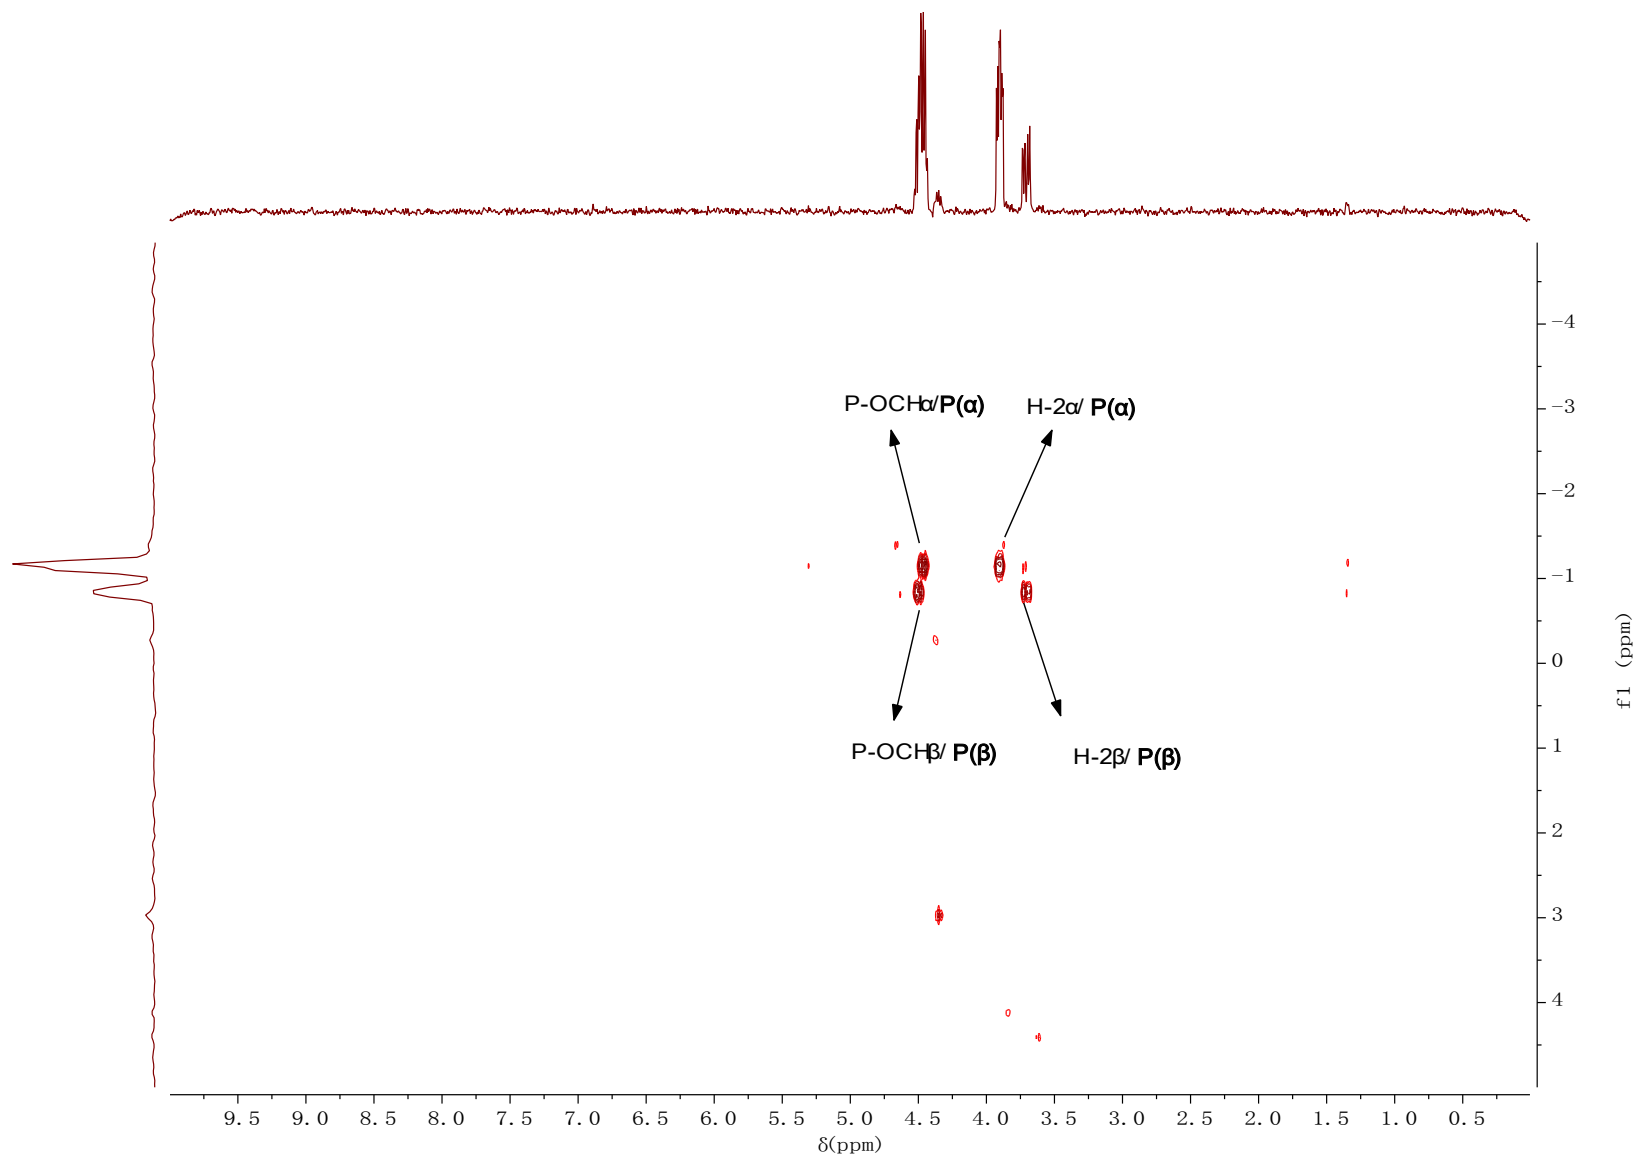

**Fig 3.  $^{31}\text{P}$ - $^1\text{H}$  correlation of G2P lactate (400 MHz,  $\text{D}_2\text{O}$ )**

**Benzyl (S)-2-((bis(diisopropylamino)phosphanyl)oxy)propanoate (2)**

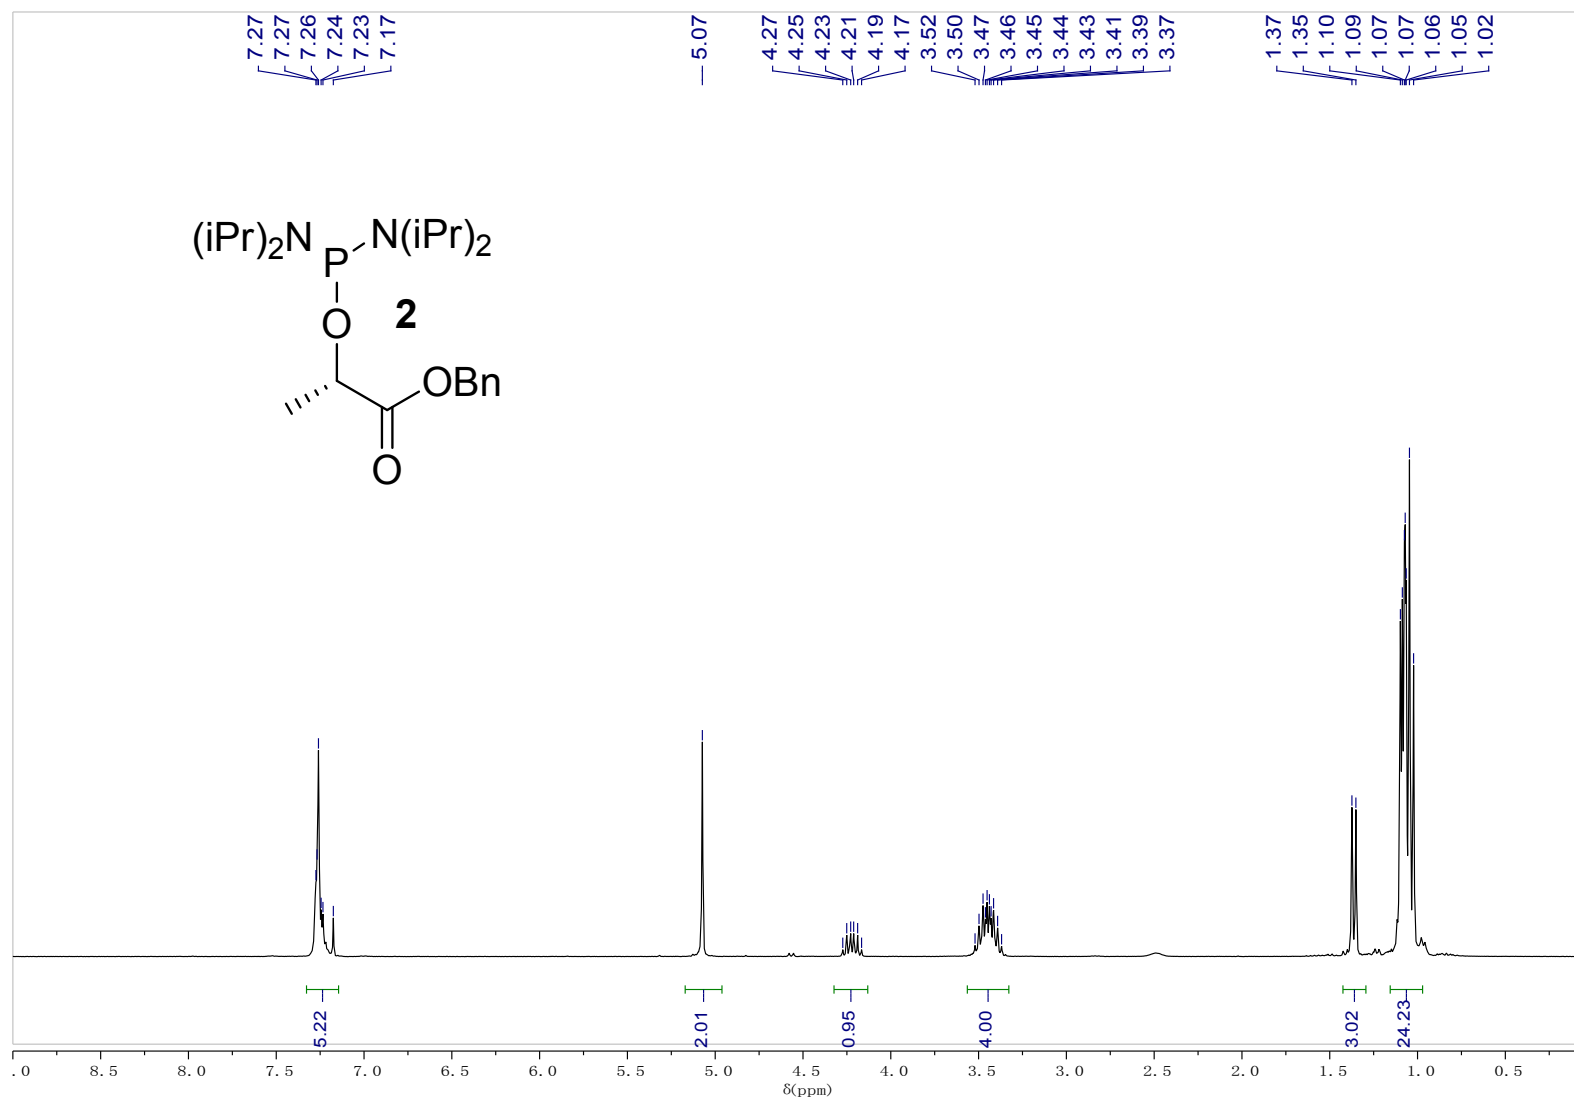

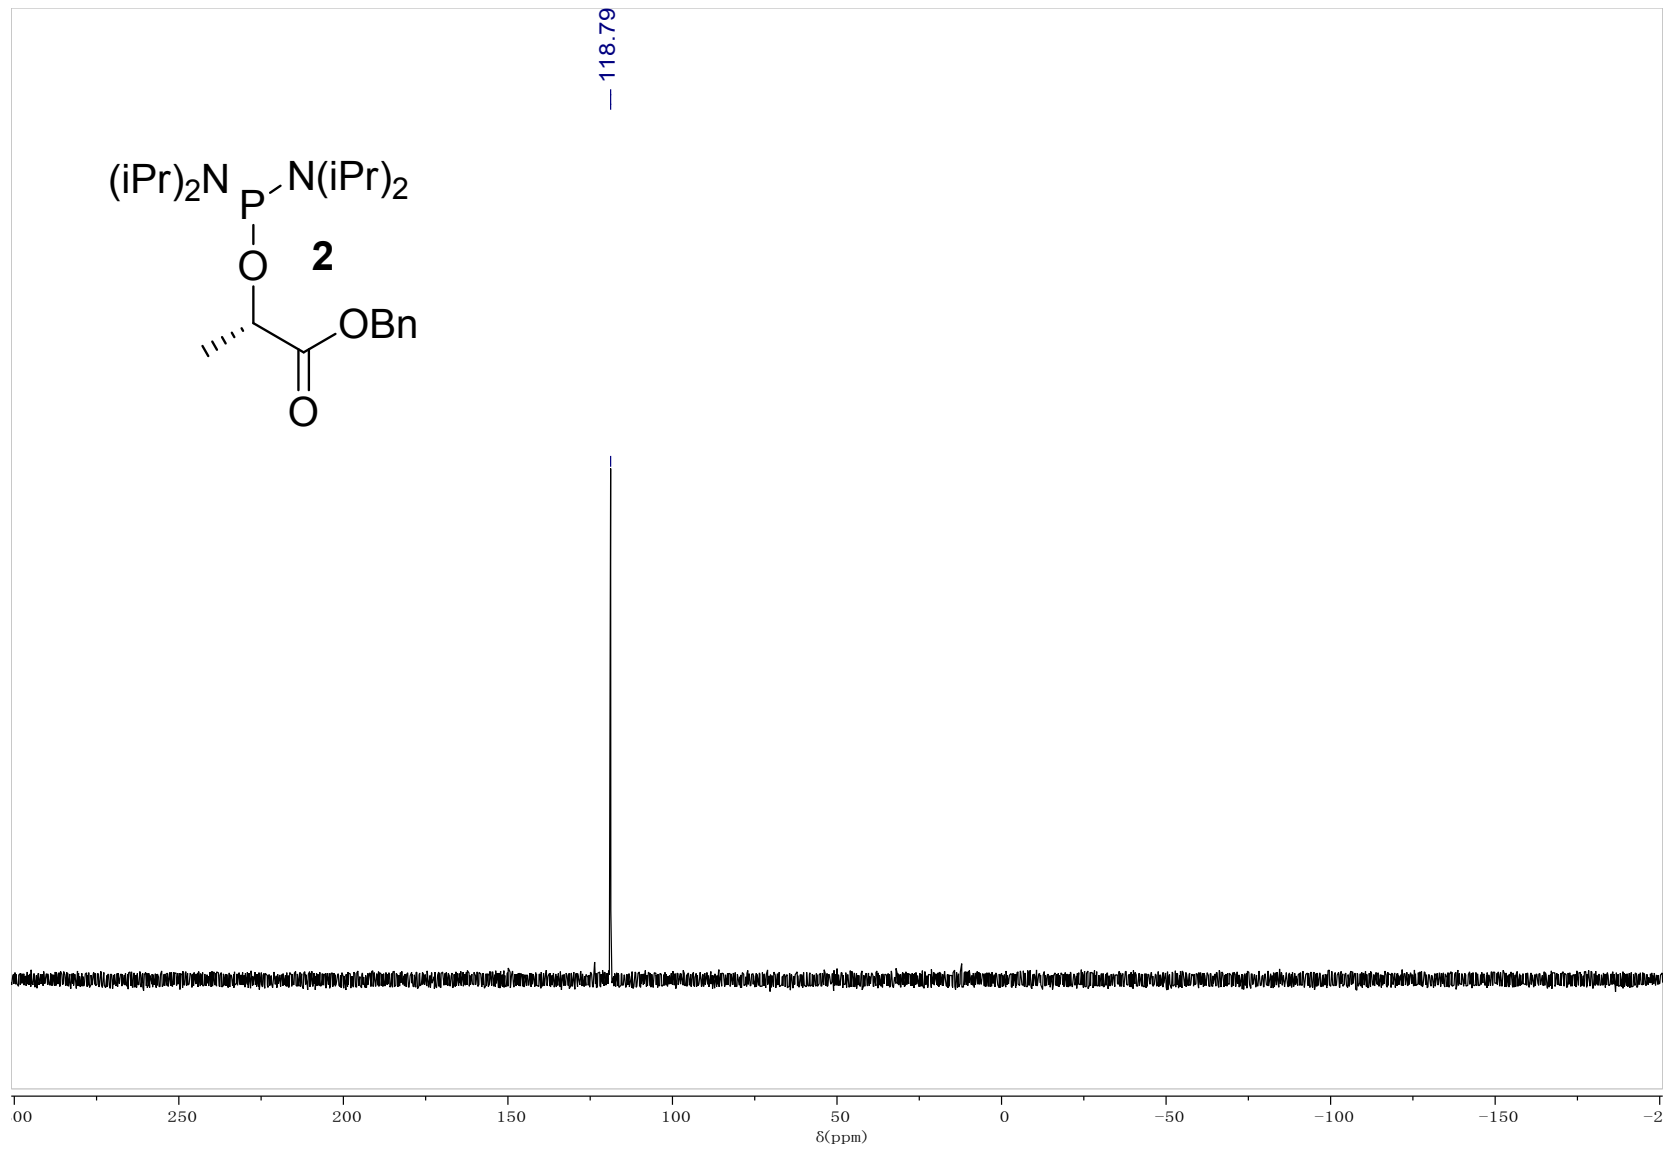

$^{31}\text{P}$ -NMR (122 MHz, Chloroform-*d*)



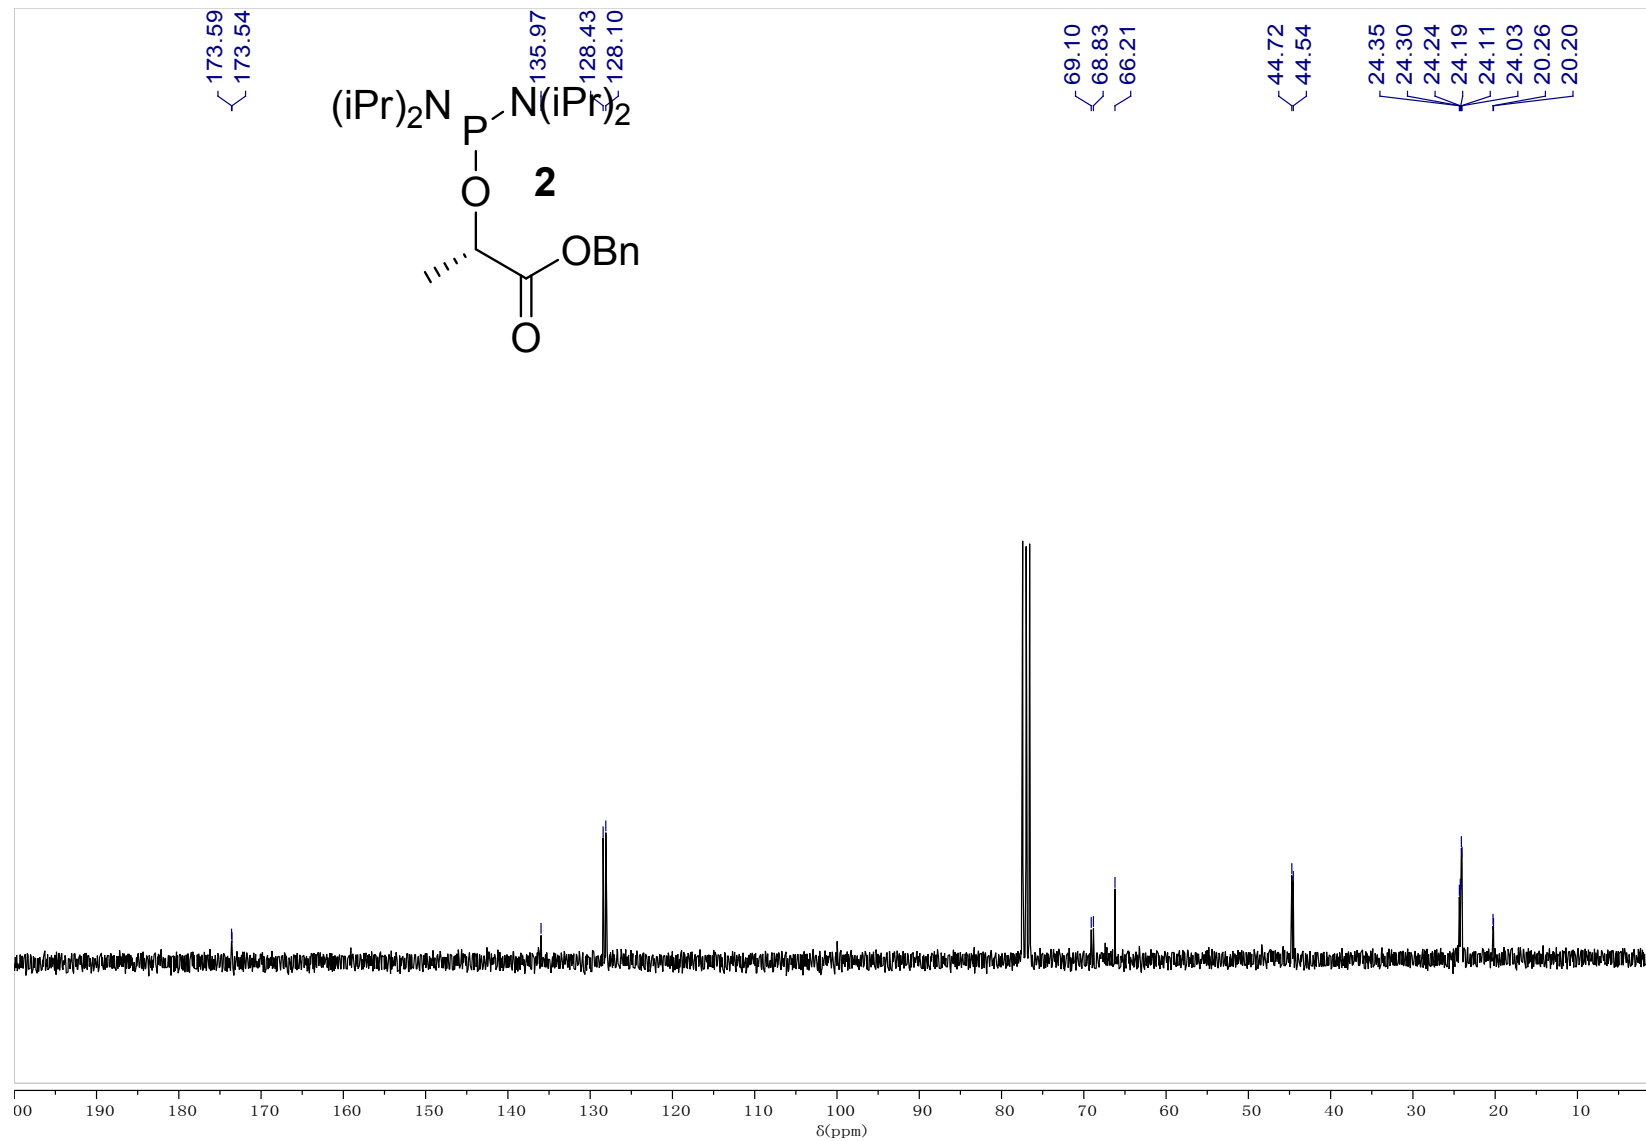

$^{13}\text{C}$ -NMR (75 MHz, Chloroform-*d*)

**Benzyl (2S)-2-(((benzyloxy)(diisopropylamino)phosphanyl)oxy)propanoate (3)**

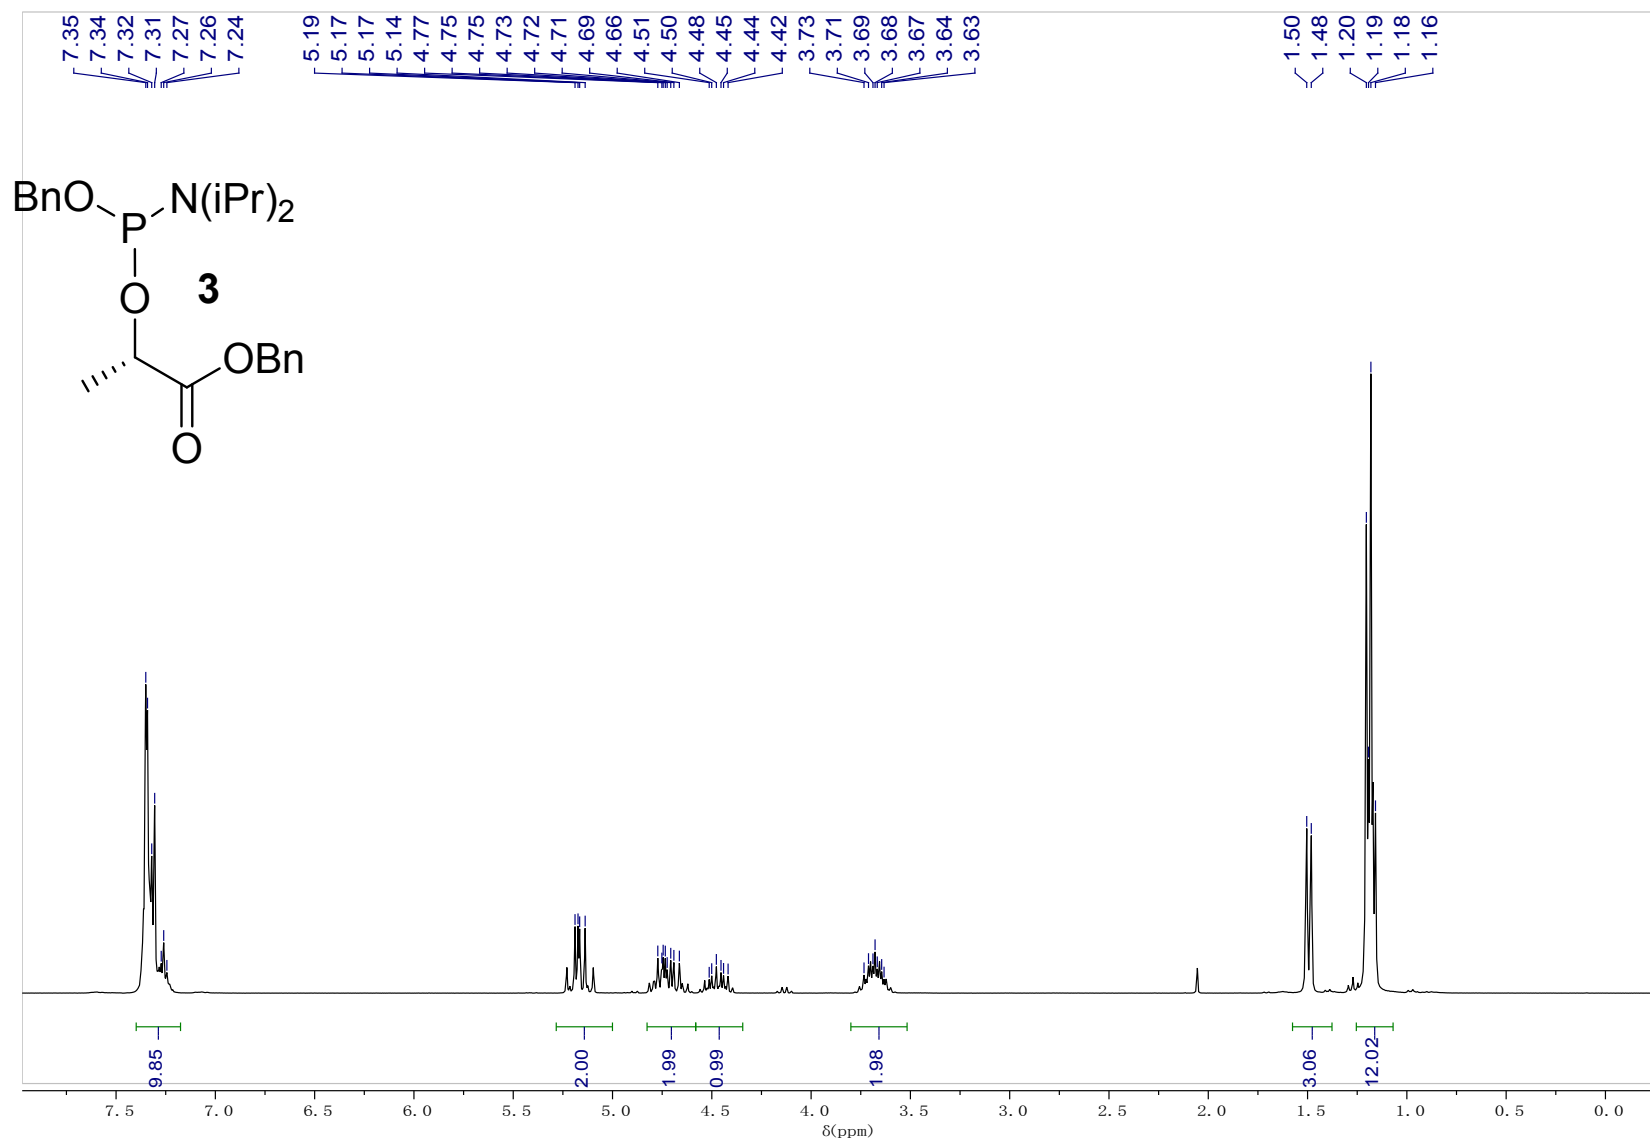

**<sup>1</sup>H-NMR (300 MHz, Chloroform-*d*)**

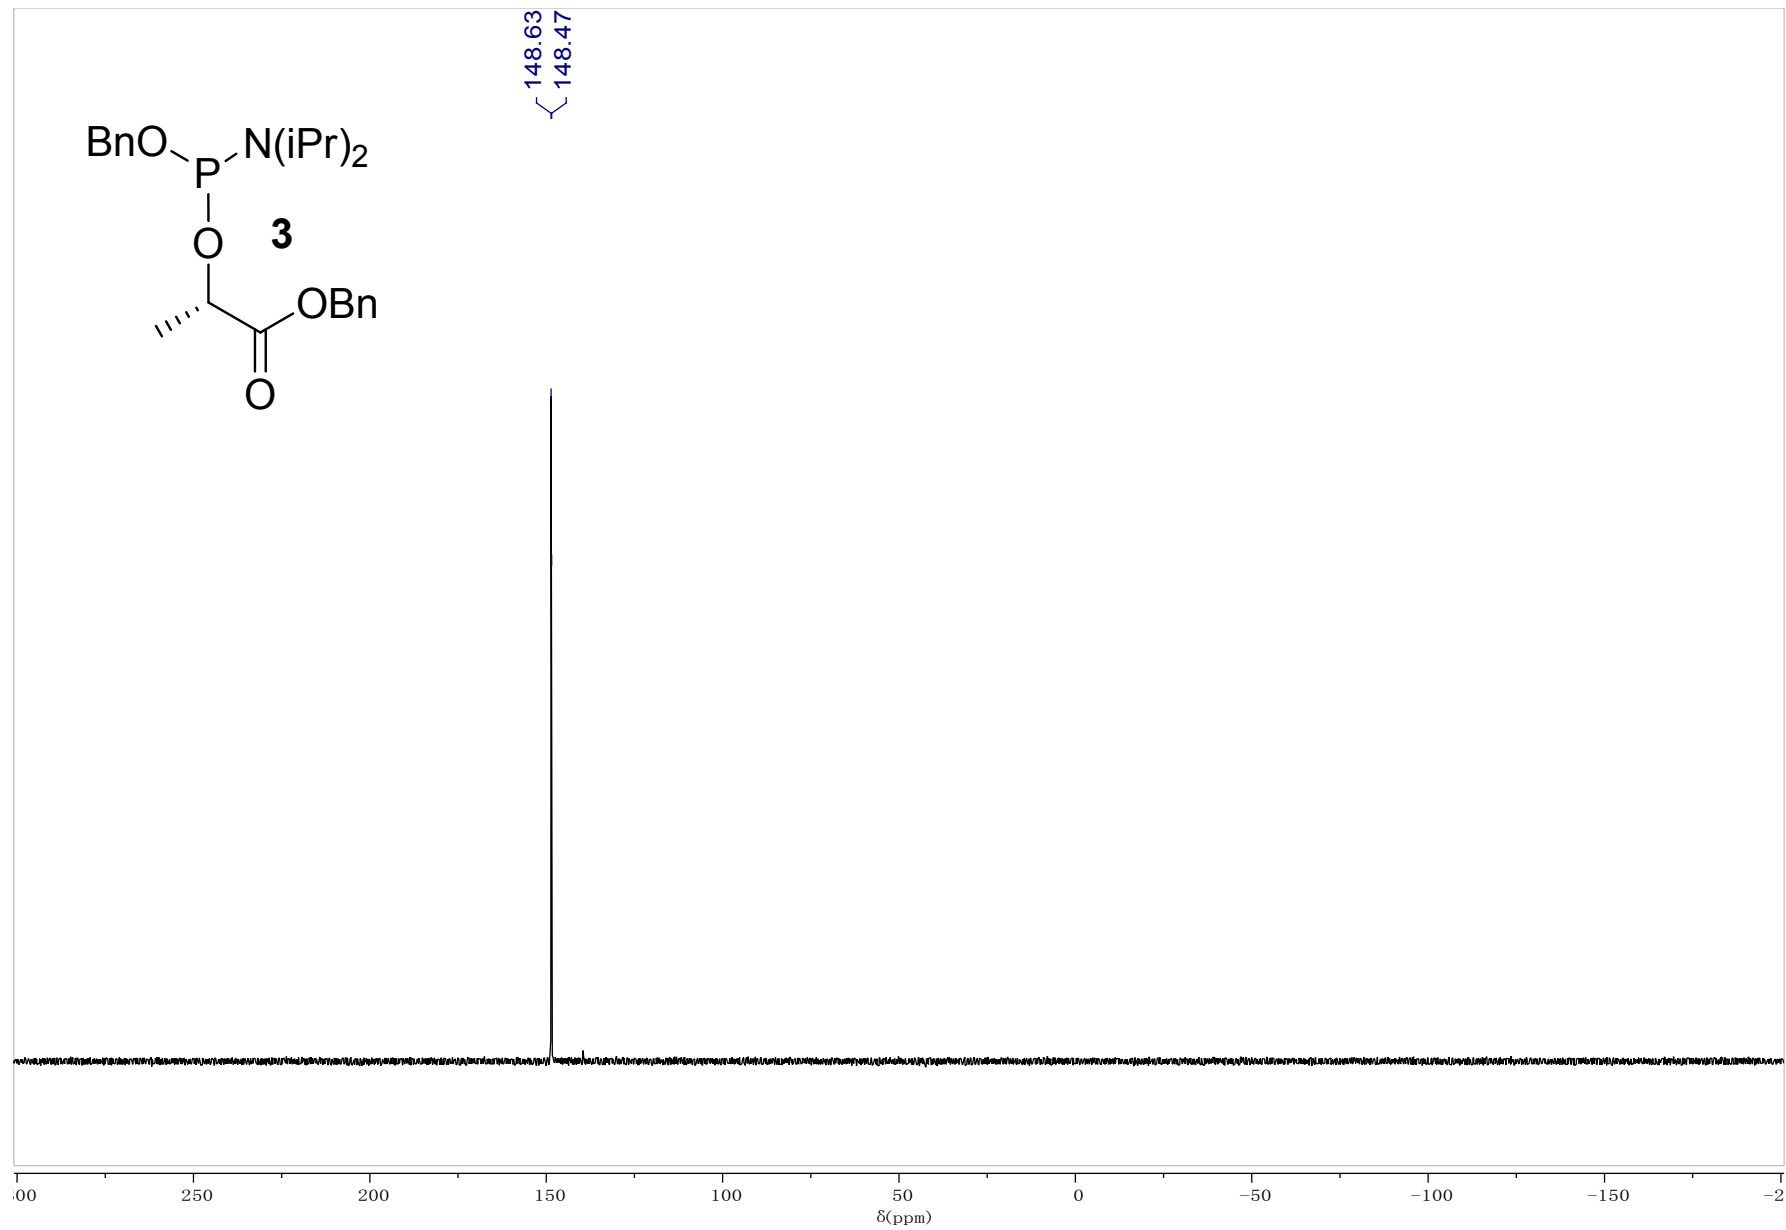

$^{31}\text{P}$ -NMR (122 MHz, Chloroform-*d*)

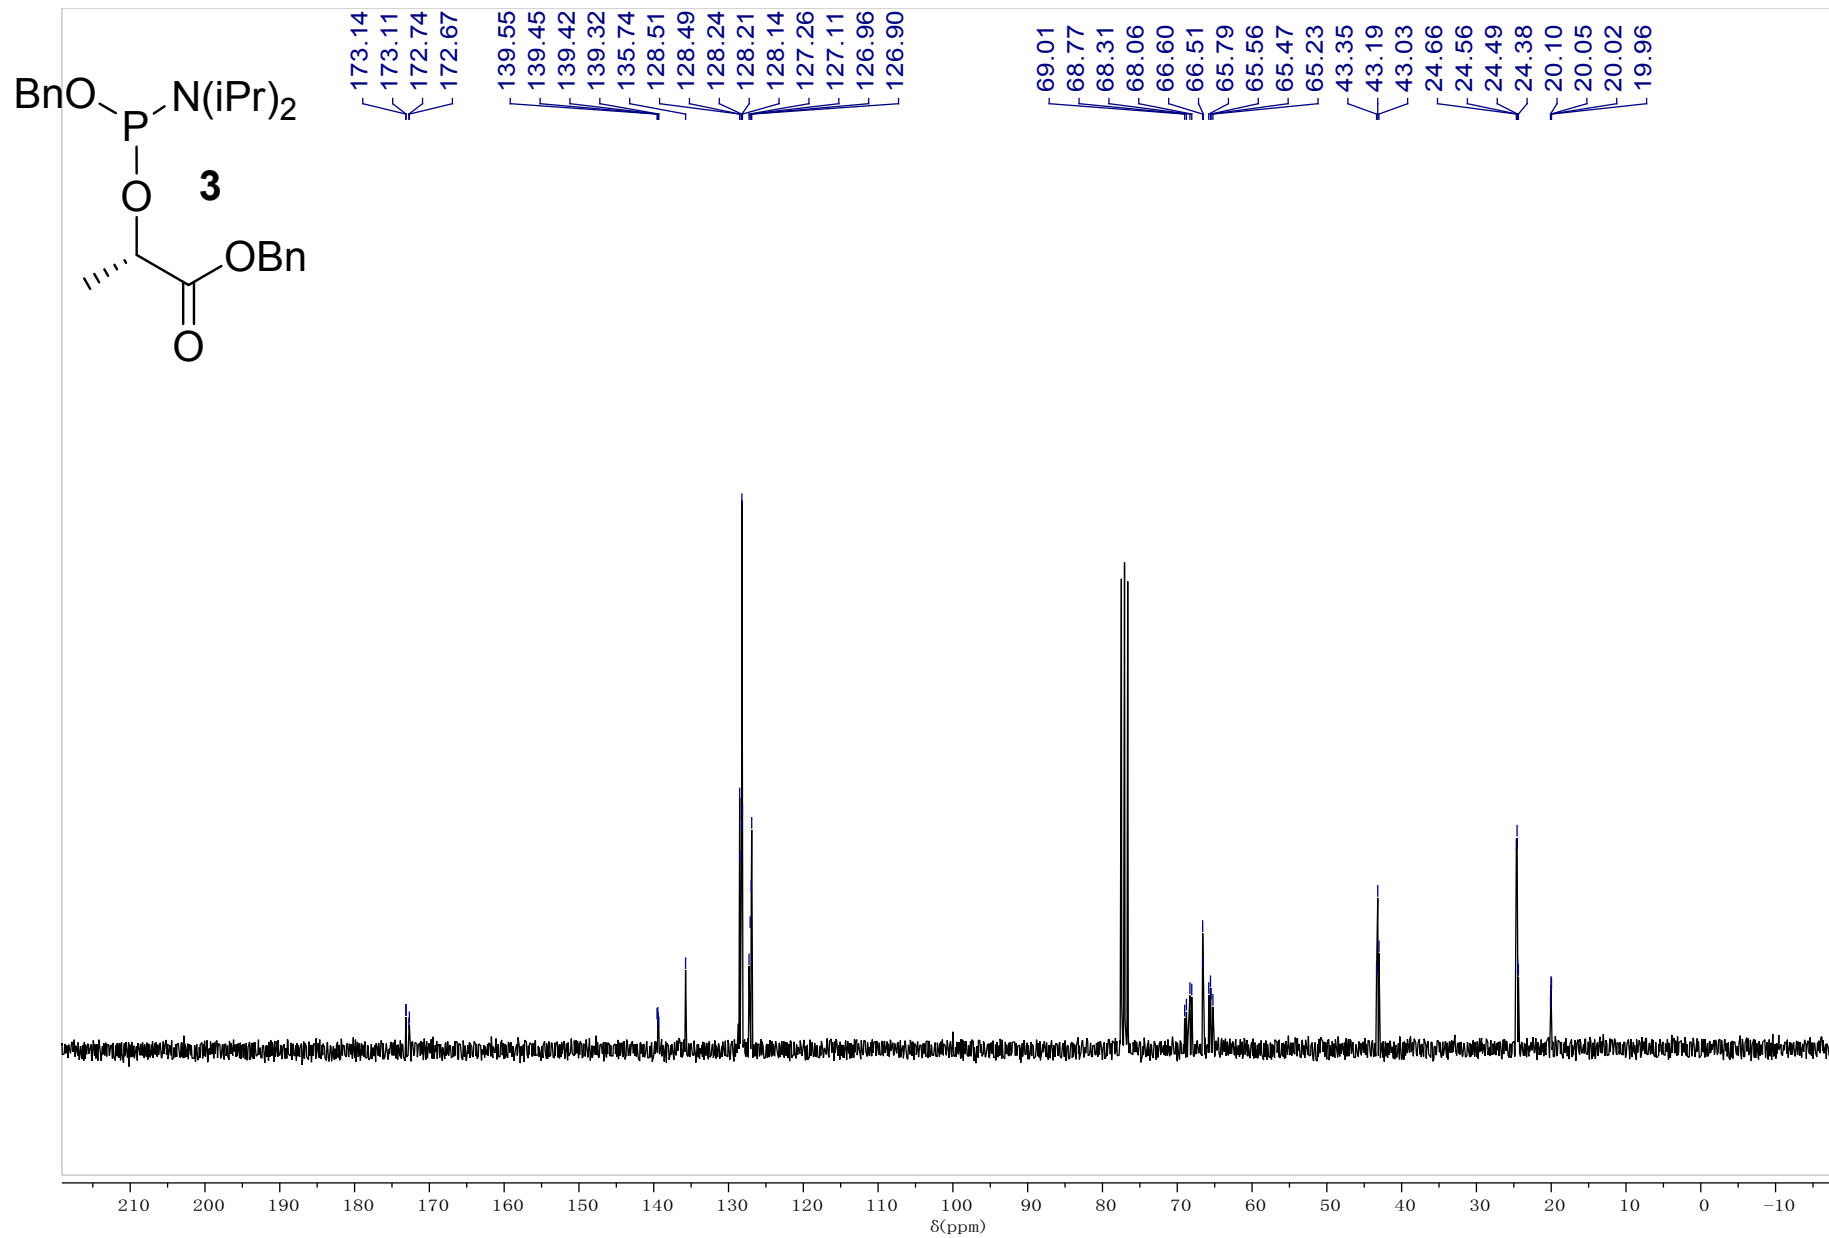

$^{13}\text{C-NMR}$  (75 MHz, Chloroform-*d*)

Benzyl (2S)-2-(((benzyloxy)(((2S,3R,4S,5R,6R)-2,4,5-tris(benzyloxy)-6-((benzyloxy)methyl)tetrahydro-2H-pyran-3-yl)oxy)phosphanyl)oxy)propanoate

(5)

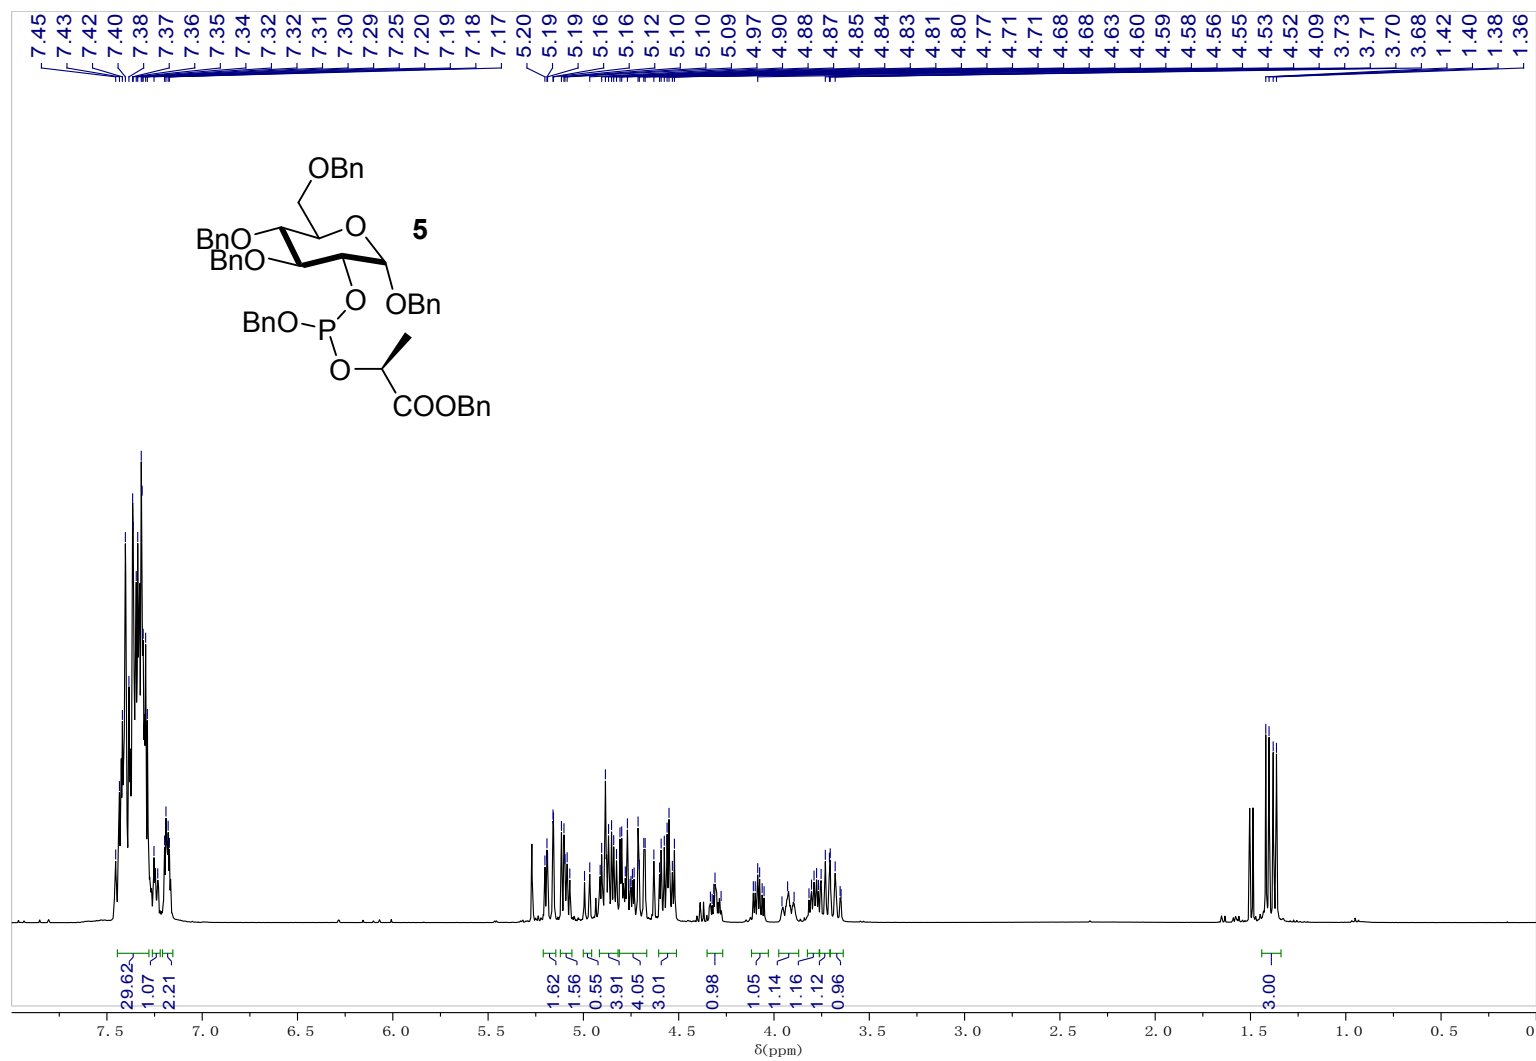

<sup>1</sup>H-NMR (400 MHz, Chloroform-*d*)

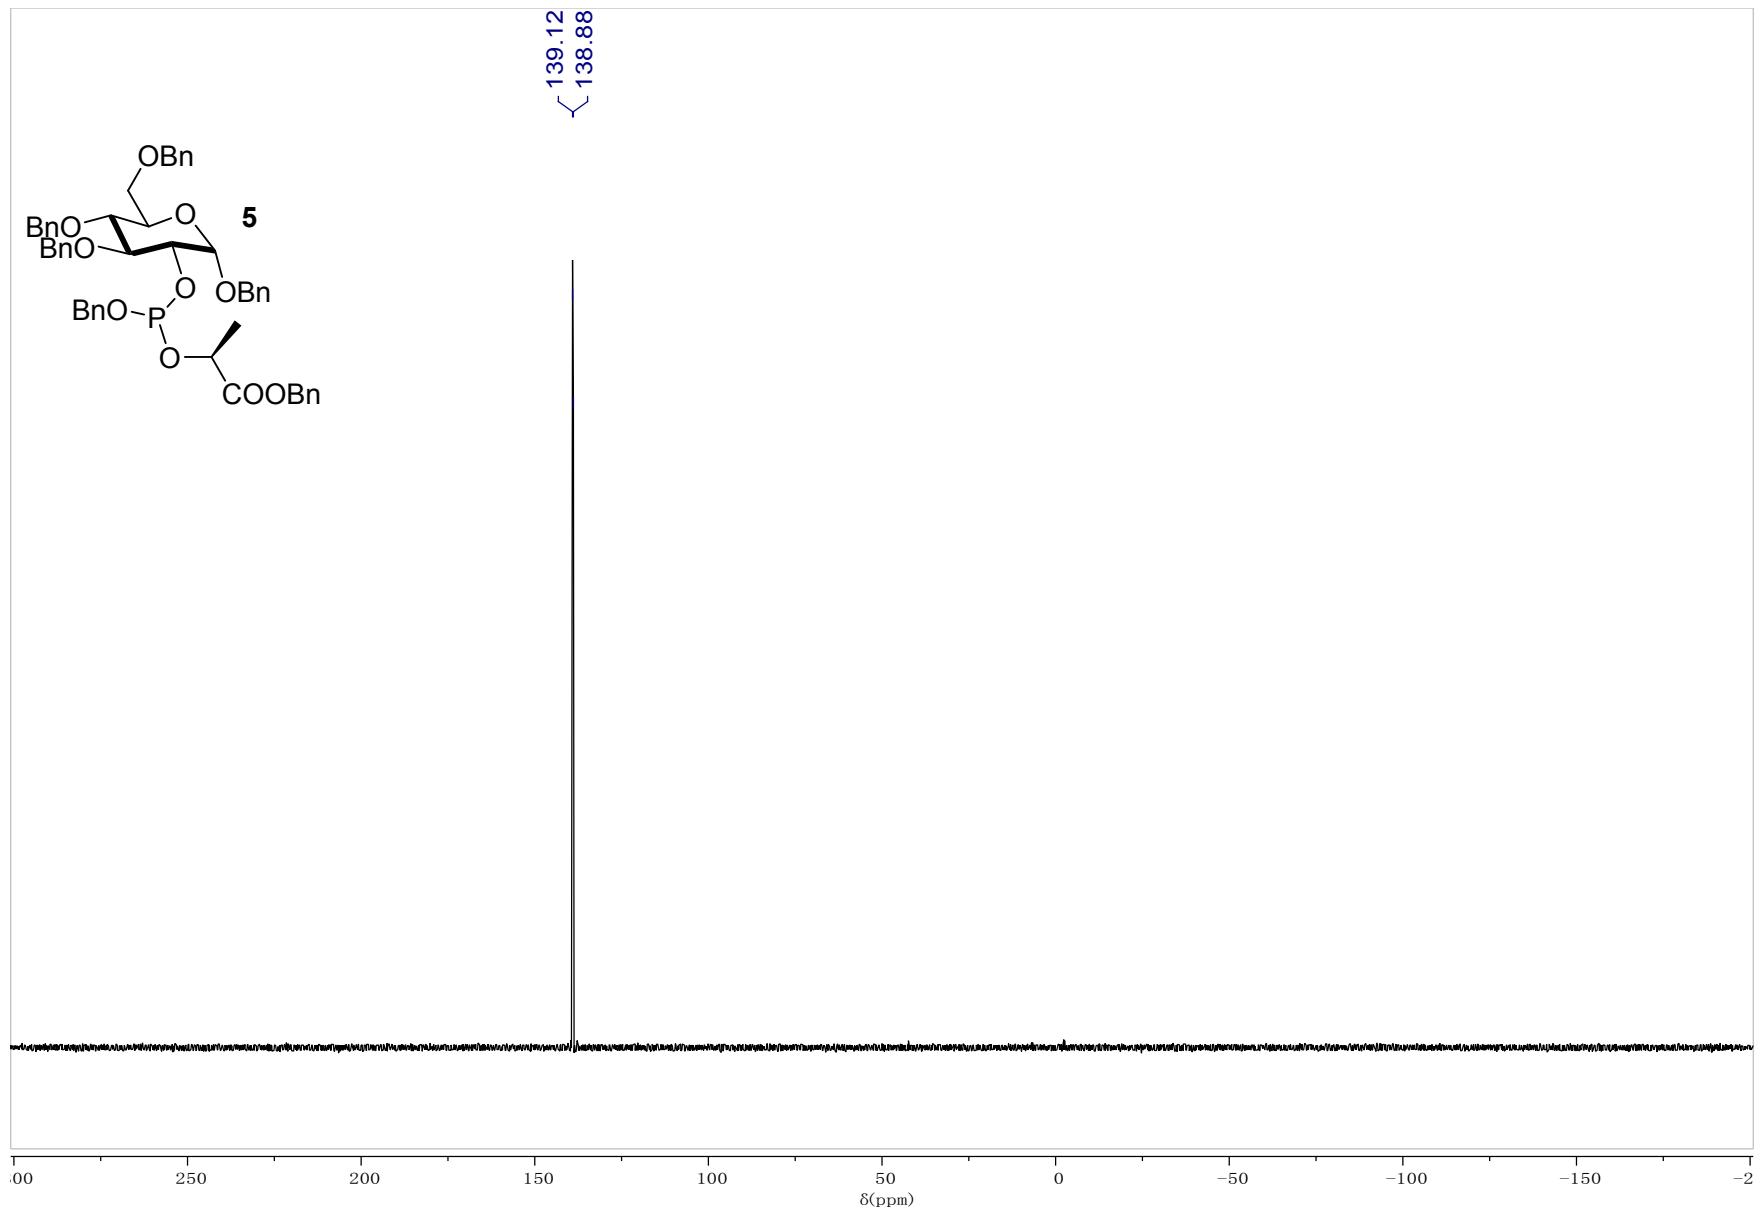

$^{31}\text{P}$ -NMR (122 MHz, Chloroform-*d*)

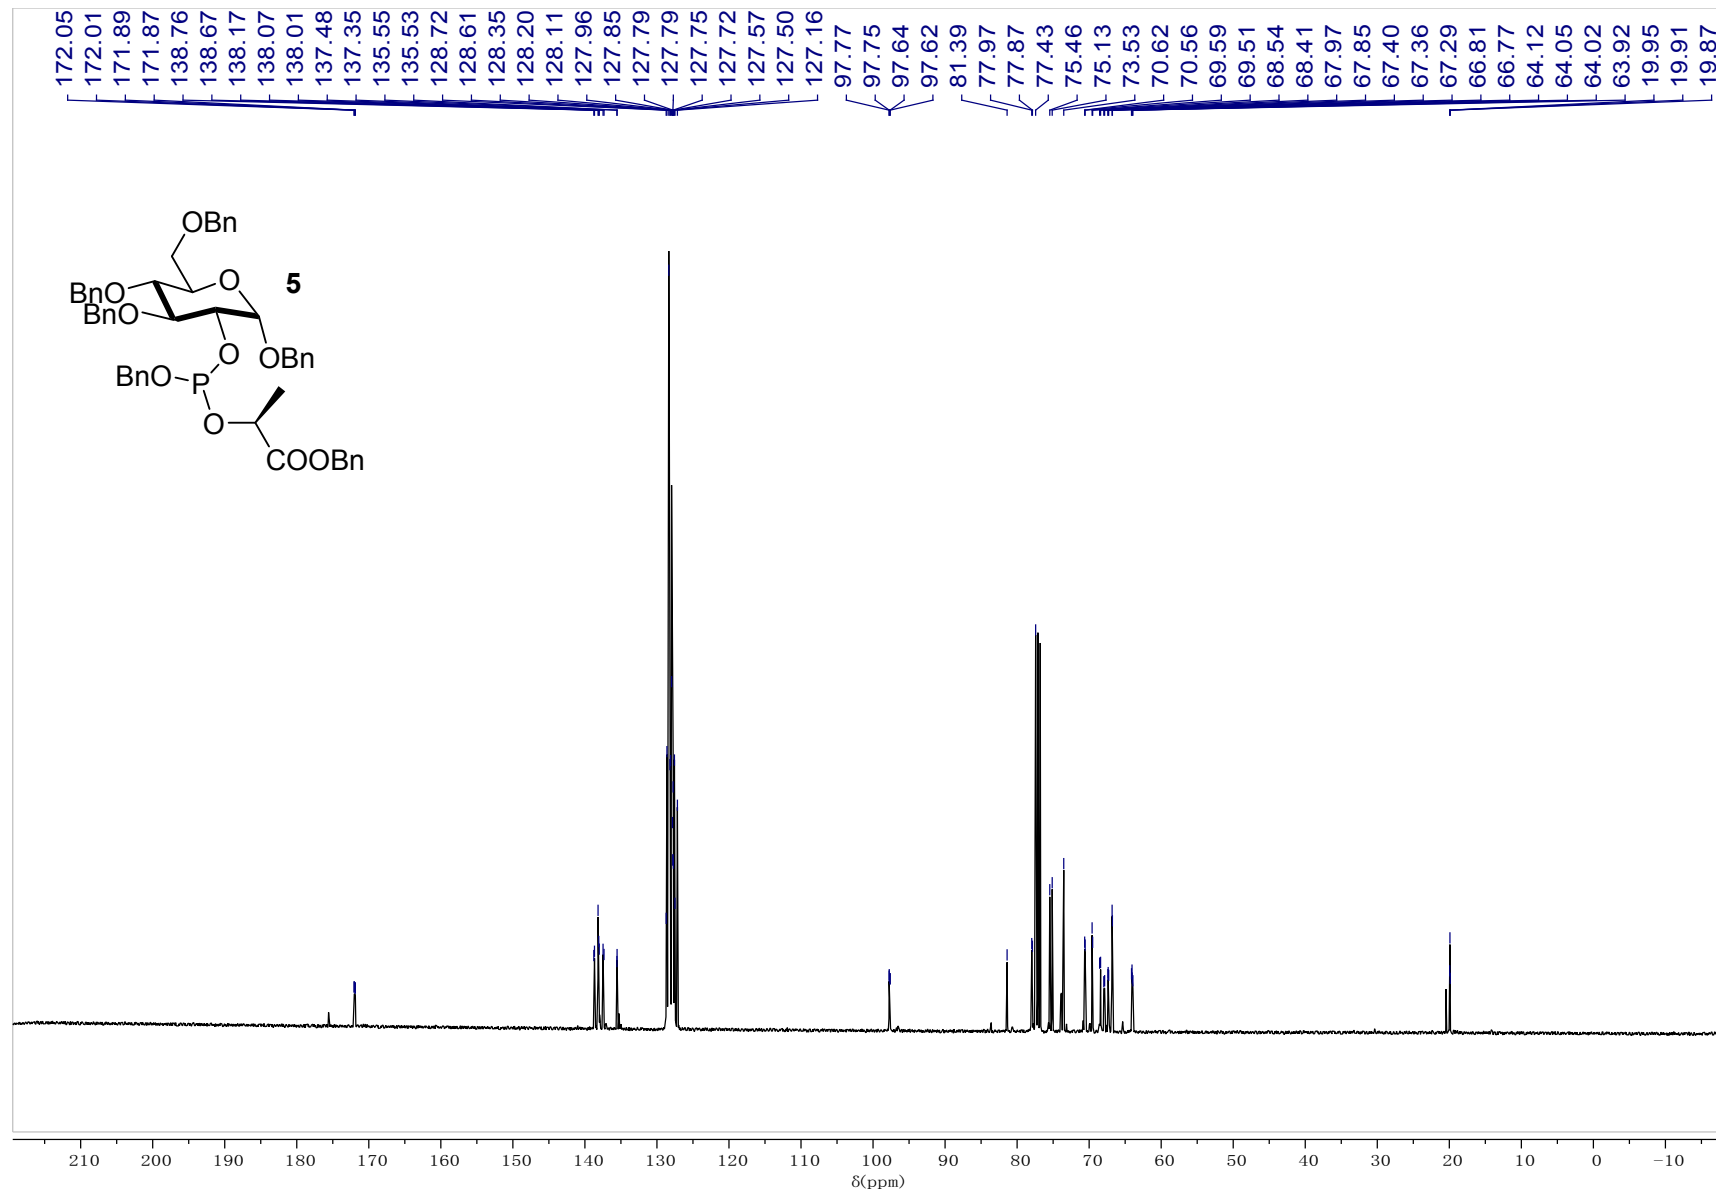

$^{13}\text{C-NMR}$  (101 MHz, Chloroform-*d*)

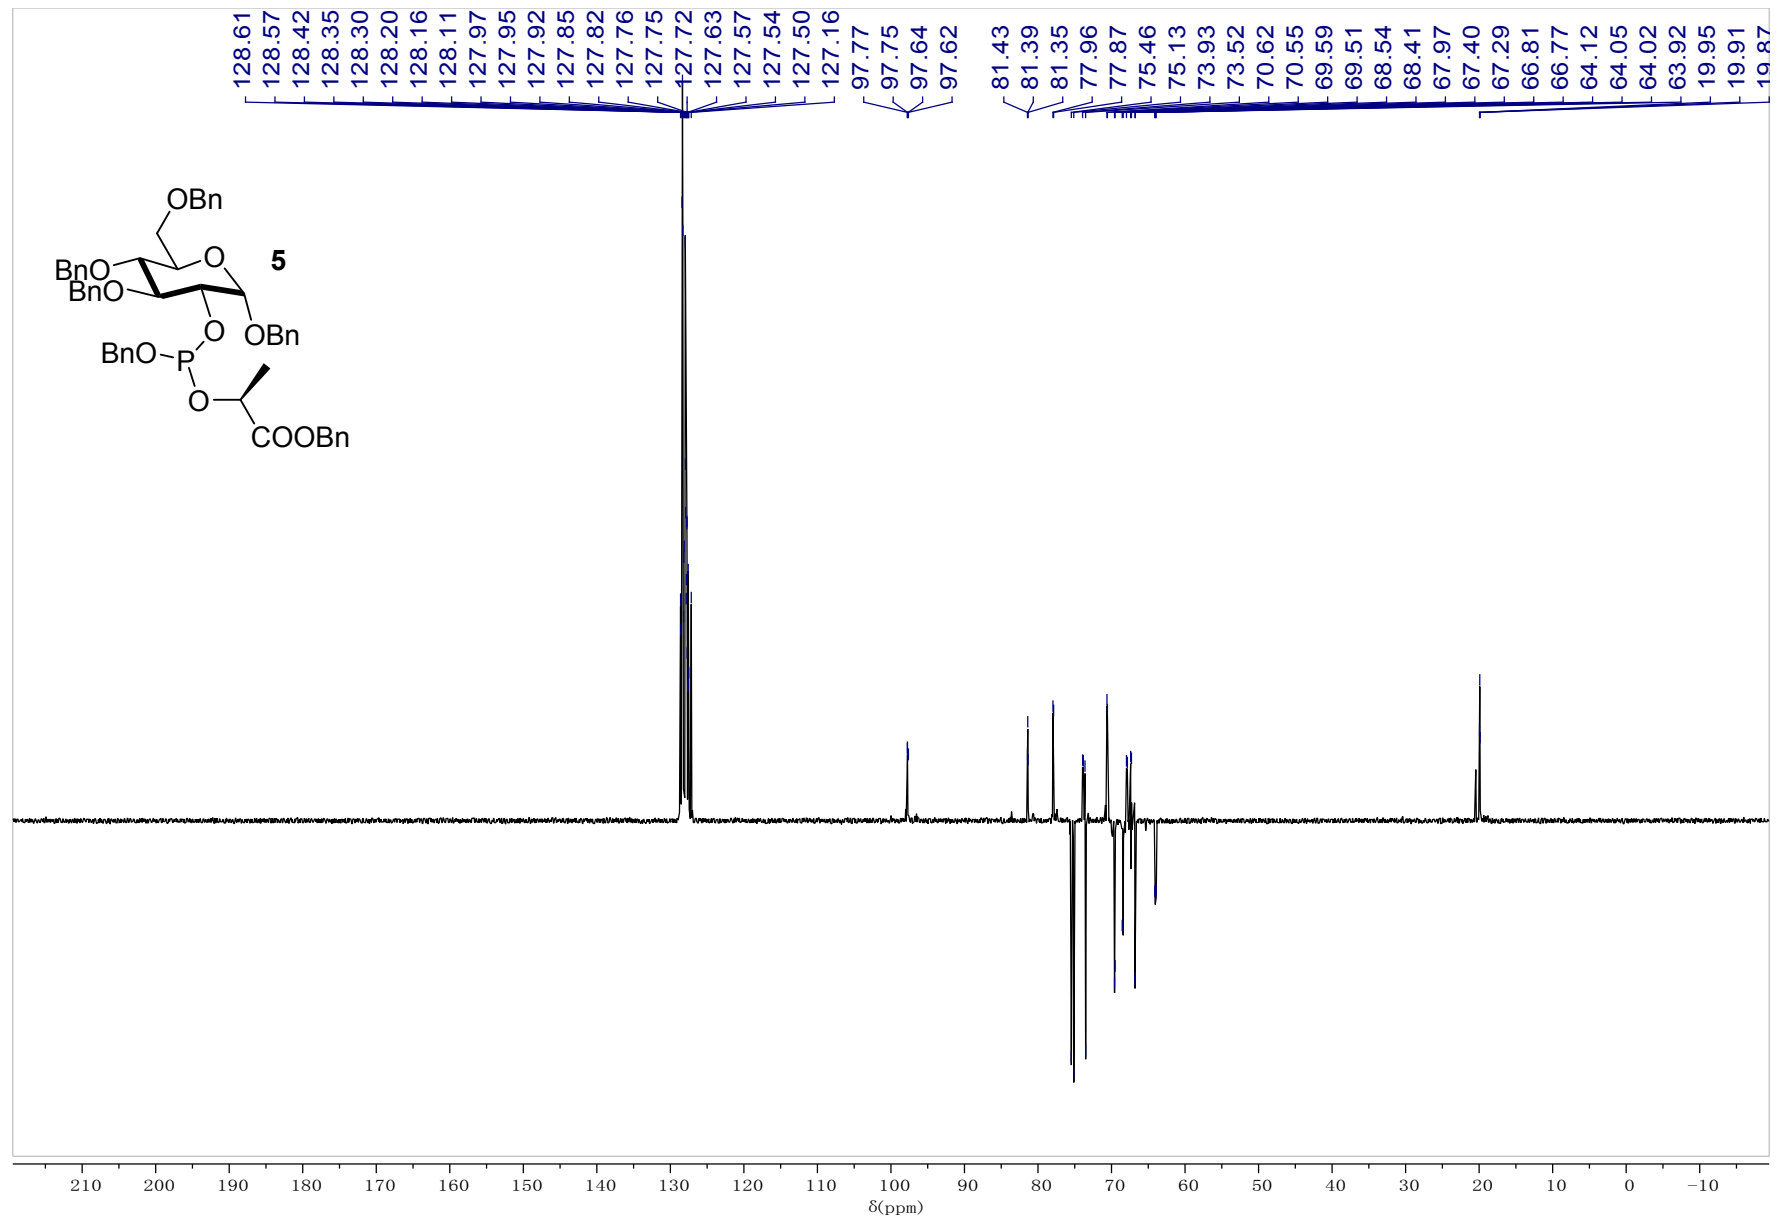

DEPT 135 <sup>13</sup>C-NMR (101 MHz, Chloroform-*d*)



Benzyl (2S)-2-(((benzyloxy)(((2S,3R,4S,5R,6R)-2,4,5-tris(benzyloxy)-6-((benzyloxy)methyl)tetrahydro-2H-pyran-3-yl)oxy)phosphoryl)oxy)propanoate

(6)

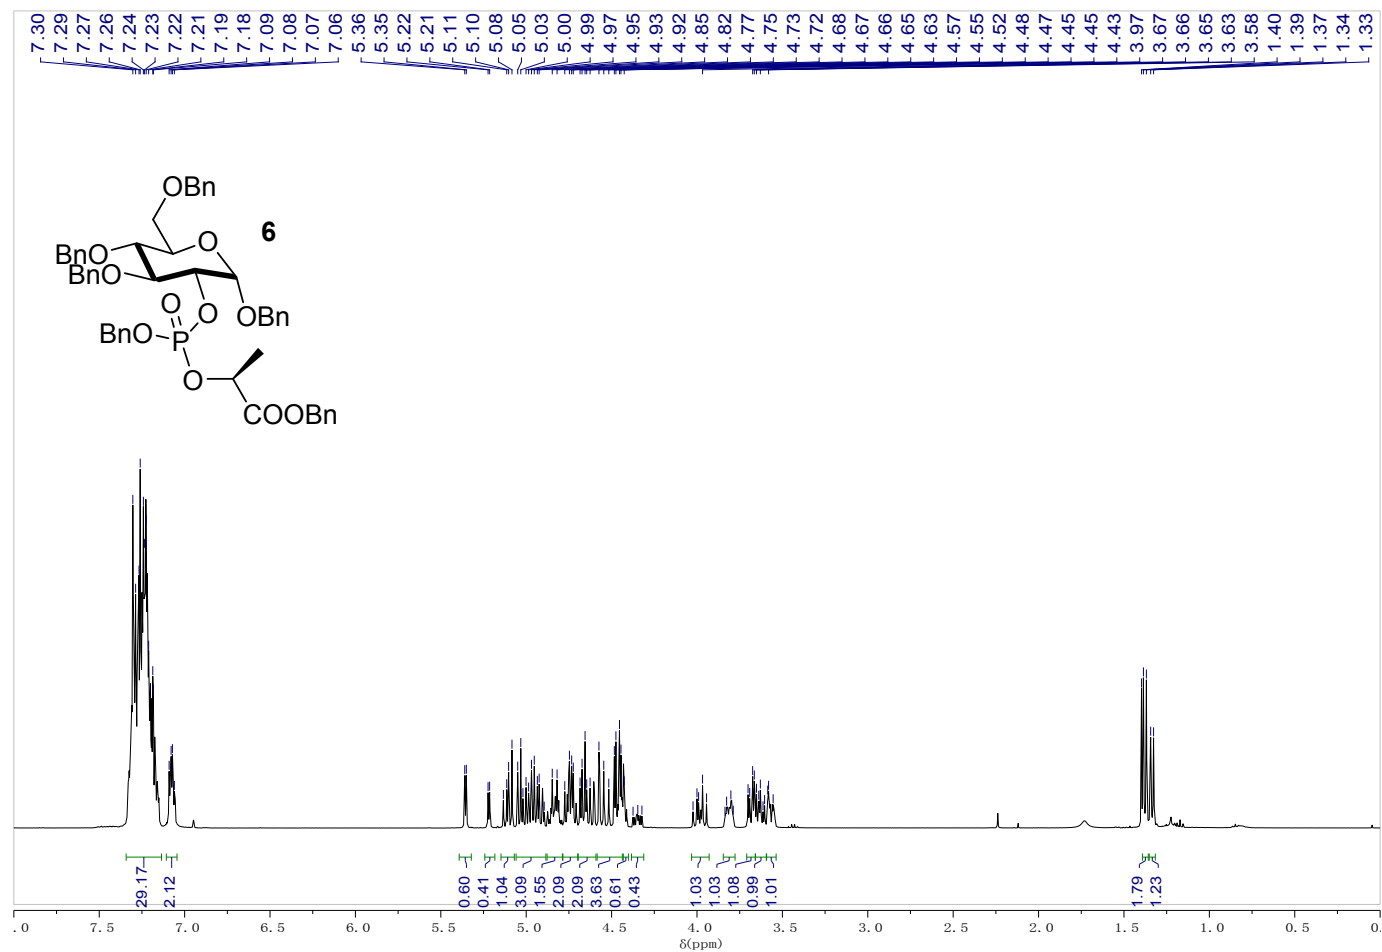

<sup>1</sup>H-NMR (400 MHz, Chloroform-*d*)

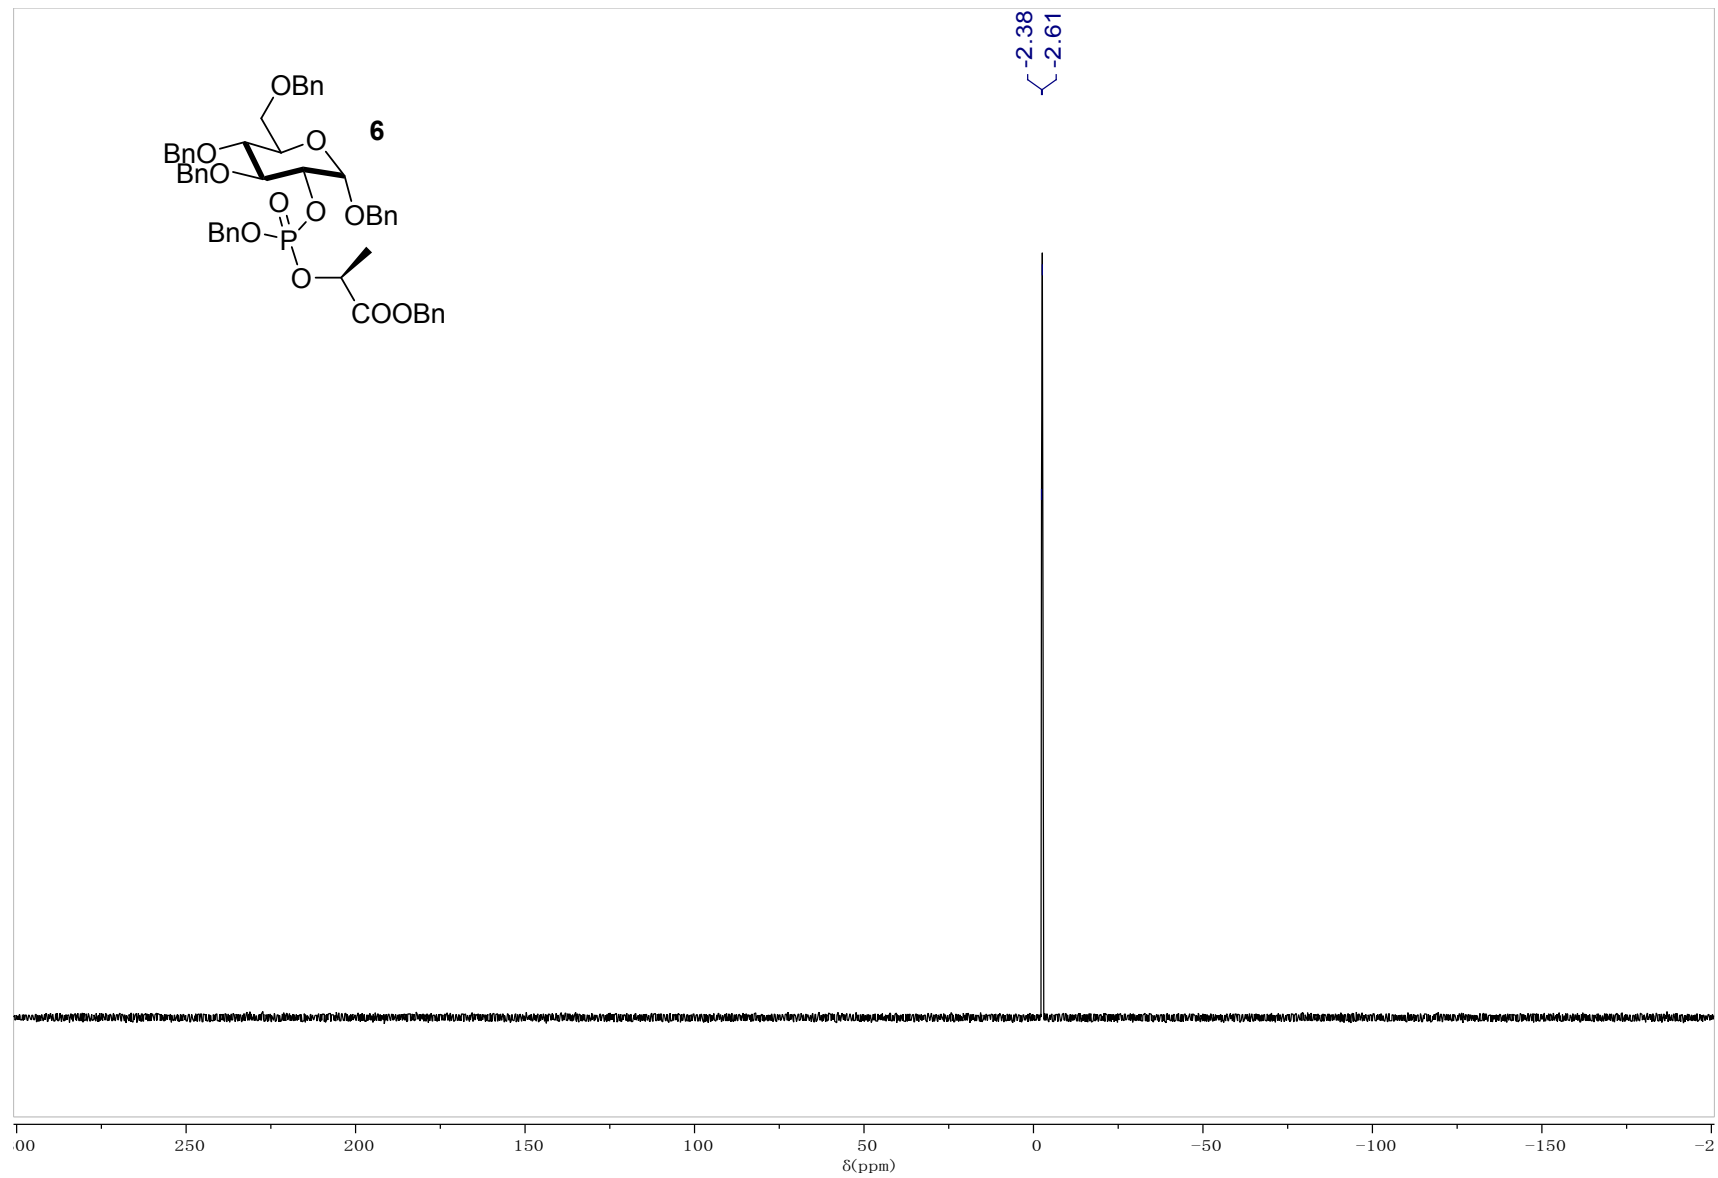

$^{31}\text{P}$ -NMR (122 MHz, Chloroform-*d*)

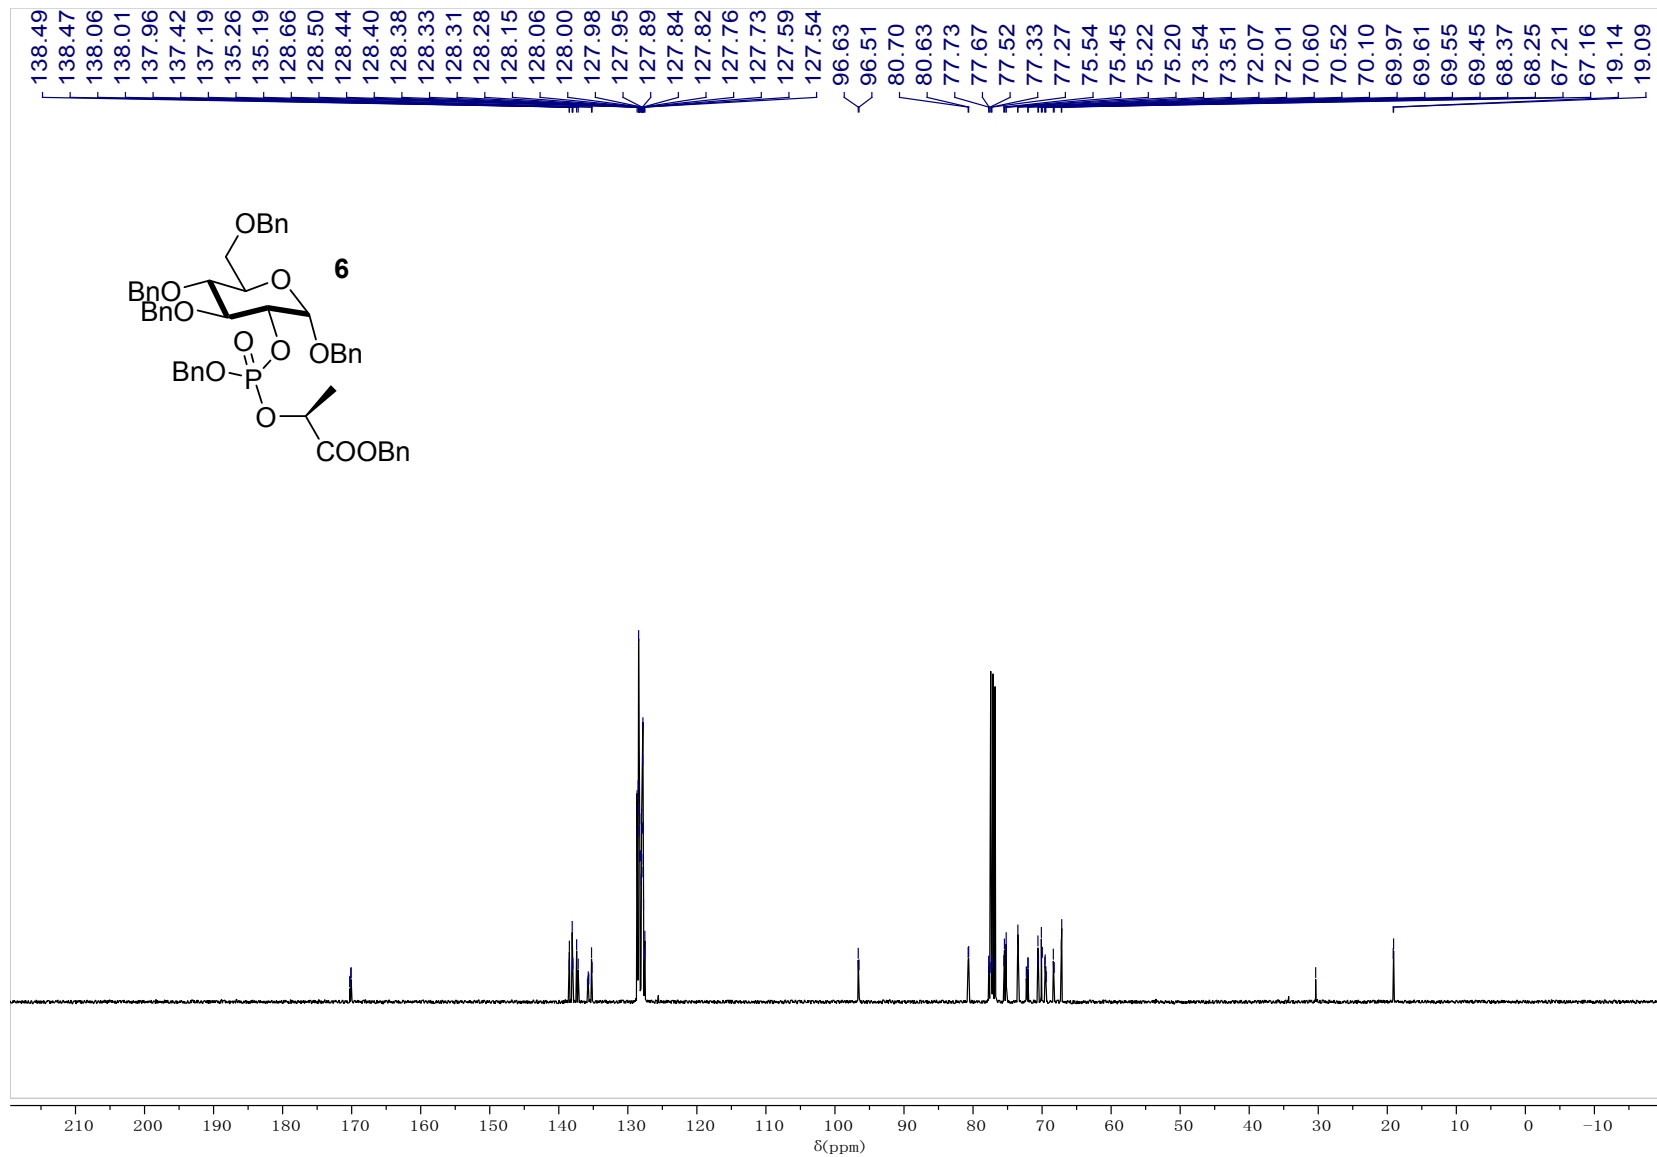

**$^{13}\text{C}$ -NMR (101 MHz, Chloroform-*d*)**

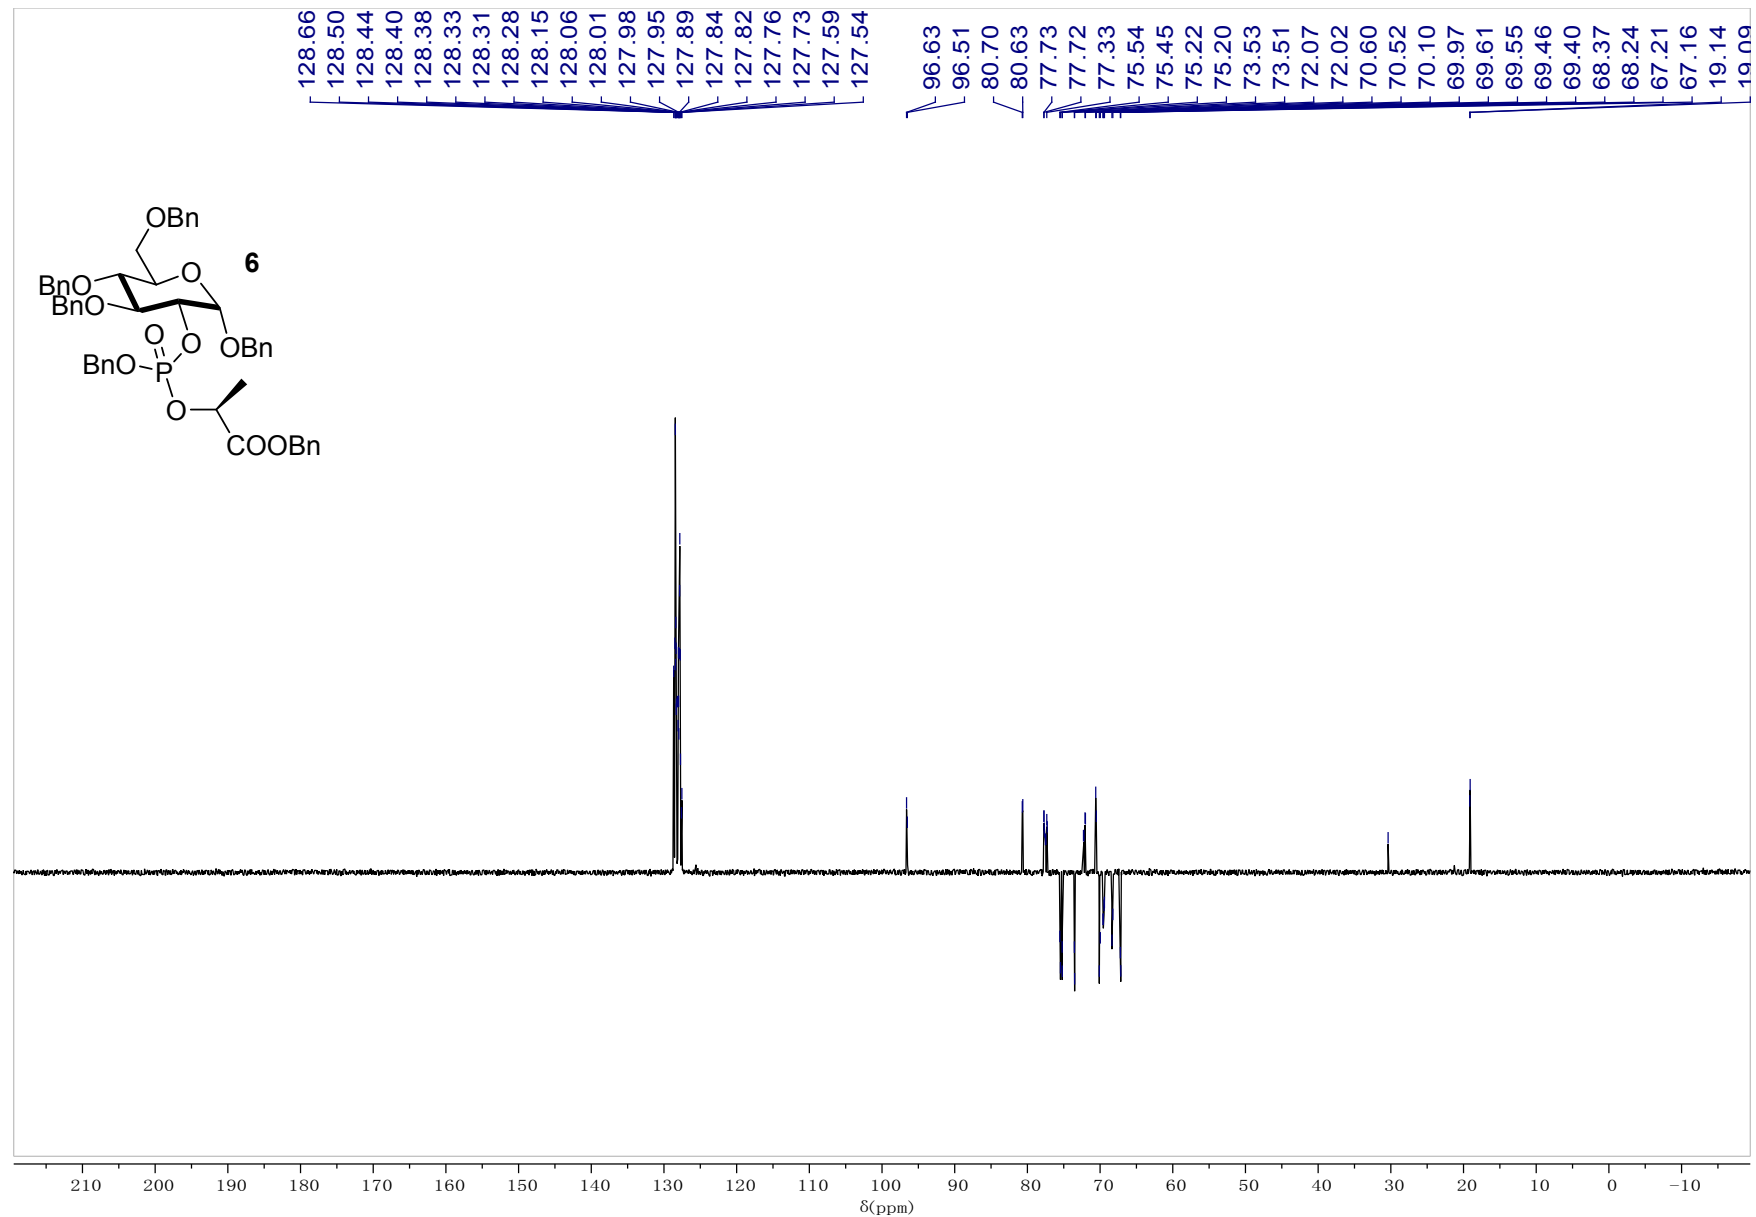

DEPT 135 <sup>13</sup>C-NMR (101 MHz, Chloroform-*d*)
